# Supplementary material for: A Direct Infusion Probe for Rapid Metabolomics of Low-Volume Samples
Source: PubMed Central journal article supplement (PMC9494293; doi:10.1021/acs.analchem.2c02918), 2022-09-07
Supplement: ac2c02918_si_001.pdf [file ac2c02918_si_001.pdf]

## Supporting Information

### A direct infusion probe for rapid metabolomics of low-volume samples

Cátia Marques<sup>1</sup>, Liangwen Liu <sup>2</sup>, Kyle D. Duncan<sup>1</sup>, Ingela Lanekoff<sup>1\*</sup>

<sup>1</sup> Department of Chemistry – BMC, Uppsala University, 75123 Uppsala, Sweden

<sup>2</sup> Department of Medical Cell Biology, Uppsala University, 75123 Uppsala, Sweden

\*Corresponding author:

Prof. Ingela Lanekoff

Ingela.Lanekoff@kemi.uu.se

Dept. of Chemistry-BMC (576)

Uppsala University

751 23 Uppsala

Sweden

## Table of Contents

|                 |    |
|-----------------|----|
| Table S1. ....  | 3  |
| Table S2. ....  | 4  |
| Table S3. ....  | 4  |
| Figure S1. .... | 5  |
| Note S1. ....   | 5  |
| Figure S2. .... | 6  |
| Figure S3. .... | 6  |
| Figure S4. .... | 7  |
| Figure S5. .... | 7  |
| Table S4. ....  | 8  |
| Table S5. ....  | 9  |
| Table S6. ....  | 10 |
| Table S7. ....  | 11 |
| Table S8. ....  | 12 |
| Table S9. ....  | 13 |
| Figure S6. .... | 17 |
| Figure S7. .... | 18 |
| Table S10. .... | 19 |
| Table S11. .... | 20 |
| Figure S8. .... | 20 |
| Table S12. .... | 21 |
| Table S13. .... | 21 |

**Table S1.** Concentrations ( $\mu\text{M}$ ) of standard solutions used in the different experiments.

| <i>Concentration (<math>\mu\text{M}</math>)</i> | <b>optimization</b> | <b>Carryover</b> | <b>RBE 400-times diluted</b> | <b>HEK293 cells</b> | <b>RSD DATA</b> | <b>INS1 cells</b> |
|-------------------------------------------------|---------------------|------------------|------------------------------|---------------------|-----------------|-------------------|
| <b>LPC 19:0</b>                                 | 5.00                | 3.57             | 0.14                         | 1.22                | 0.83            | 1.53              |
| <b>PG 30:0</b>                                  | 2.50                | 32.13            | 1.27                         | 0.90                | 1.12            | 1.29              |
| <b>PE 30:0</b>                                  | 2.50                | 34.46            | 1.36                         | 0.90                | 1.33            | 1.24              |
| <b>Acetylcholine-d<sub>9</sub></b>              | 5.00                | 1.54             | 0.06                         | 0.66                | 0.19            | 0.90              |
| <b>Glucose-d<sub>2</sub></b>                    | 5.00                | 16.32            | 0.64                         | 0.75                | 0.93            | 0.90              |
| <b>GABA-d<sub>2</sub></b>                       | 5.00                | 9.99             | 0.39                         | 0.70                | 0.99            | 0.13              |
| <b>PC 11:0/11:0</b>                             | -                   | 7.26             | 0.29                         | -                   | 0.78            | 1.17              |
| <b>FA 18:1-d<sub>9</sub></b>                    | -                   | 3.01             | 0.12                         | -                   | 0.37            | 0.48              |
| <b>Histidine-<sup>15</sup>N</b>                 | 1.7                 | 1.51             | 0.06                         | 0.10                | 0.08            | 0.27              |
| <b>Methionine-<sup>15</sup>N</b>                | 2.7                 | 2.42             | 0.10                         | 0.15                | 0.13            | 0.43              |
| <b>Tyrosine-<sup>15</sup>N</b>                  | 3.3                 | 3.02             | 0.12                         | 0.19                | 0.16            | 0.54              |
| <b>Arginine-<sup>15</sup>N</b>                  | 5.0                 | 4.53             | 0.18                         | 0.29                | 0.24            | 0.81              |
| <b>Lysine-<sup>15</sup>N</b>                    | 5.7                 | 5.14             | 0.20                         | 0.33                | 0.28            | 0.92              |
| <b>Cysteine-<sup>15</sup>N</b>                  | 6.7                 | 6.05             | 0.24                         | 0.39                | 0.32            | 1.08              |
| <b>Glutamine-<sup>15</sup>N</b>                 | 6.7                 | 6.05             | 0.24                         | 0.39                | 0.32            | 1.08              |
| <b>Phenylalanine-<sup>15</sup>N</b>             | 6.7                 | 6.05             | 0.24                         | 0.39                | 0.32            | 1.08              |
| <b>Tryptophan-<sup>15</sup>N</b>                | 6.7                 | 6.05             | 0.24                         | 0.39                | 0.32            | 1.08              |
| <b>Proline-<sup>15</sup>N</b>                   | 6.7                 | 6.05             | 0.24                         | 0.39                | 0.32            | 1.08              |
| <b>Isoleucine-<sup>15</sup>N</b>                | 9.3                 | 8.46             | 0.33                         | 0.54                | 0.45            | 1.51              |
| <b>Serine-<sup>15</sup>N</b>                    | 9.7                 | 8.77             | 0.35                         | 0.56                | 0.47            | 1.56              |
| <b>Threonine-<sup>15</sup>N</b>                 | 11.0                | 9.97             | 0.39                         | 0.64                | 0.53            | 1.78              |
| <b>Valine-<sup>15</sup>N</b>                    | 12.0                | 10.88            | 0.43                         | 0.70                | 0.58            | 1.94              |
| <b>Leucine-<sup>15</sup>N</b>                   | 15.0                | 13.60            | 0.54                         | 0.87                | 0.73            | 2.43              |
| <b>Glutamic acid-<sup>15</sup>N</b>             | 16.0                | 14.51            | 0.57                         | 0.93                | 0.78            | 2.59              |
| <b>Glycine-<sup>15</sup>N</b>                   | 19.3                | 17.53            | 0.69                         | 1.12                | 0.94            | 3.13              |
| <b>Alanine-<sup>15</sup>N</b>                   | 25.0                | 22.67            | 0.89                         | 1.45                | 1.21            | 4.04              |
| <b>Aspartic acid-<sup>15</sup>N</b>             | 28.0                | 25.39            | 1.00                         | 1.63                | 1.36            | 4.53              |
| <b>Asparagine-<sup>15</sup>N</b>                | 28.0                | 25.39            | 1.00                         | 1.63                | 1.36            | 4.53              |

**Table S2.** Concentrations ( $\mu\text{M}$ ) of standards used to assess LODs. The values are the average of triplicates of sample preparation.

|                                | IS1  | IS2  | IS3  | IS4  | IS5  | IS6  | IS7  | IS8  |
|--------------------------------|------|------|------|------|------|------|------|------|
| LPC 19:0                       | 0.00 | 0.12 | 0.24 | 0.36 | 0.01 | 0.58 | 0.70 | 0.82 |
| PG 30:0                        | 0.04 | 1.10 | 2.16 | 3.26 | 0.06 | 5.20 | 6.31 | 7.41 |
| PE 30:0                        | 0.04 | 1.18 | 2.31 | 3.50 | 0.06 | 5.58 | 6.76 | 7.95 |
| Acetylcholine- $\text{d}_9$    | 0.00 | 0.05 | 0.10 | 0.16 | 0.00 | 0.25 | 0.30 | 0.36 |
| Glucose- $\text{d}_2$          | 0.02 | 0.56 | 1.10 | 1.66 | 0.03 | 2.64 | 3.20 | 3.77 |
| GABA- $\text{d}_2$             | 0.01 | 0.34 | 0.67 | 1.01 | 0.02 | 1.62 | 1.96 | 2.30 |
| PC 11:0/11:0                   | 0.01 | 0.25 | 0.49 | 0.74 | 0.01 | 1.18 | 1.43 | 1.68 |
| FA 18:1- $\text{d}_9$          | 0.00 | 0.10 | 0.20 | 0.31 | 0.01 | 0.49 | 0.59 | 0.69 |
| Histidine- $^{15}\text{N}$     | 0.00 | 0.05 | 0.10 | 0.15 | 0.00 | 0.25 | 0.30 | 0.35 |
| Methionine- $^{15}\text{N}$    | 0.00 | 0.08 | 0.16 | 0.25 | 0.01 | 0.39 | 0.48 | 0.56 |
| Tyrosine- $^{15}\text{N}$      | 0.00 | 0.10 | 0.20 | 0.31 | 0.01 | 0.49 | 0.59 | 0.70 |
| Arginine- $^{15}\text{N}$      | 0.01 | 0.16 | 0.30 | 0.46 | 0.01 | 0.73 | 0.89 | 1.05 |
| Lysine- $^{15}\text{N}$        | 0.01 | 0.18 | 0.35 | 0.52 | 0.01 | 0.83 | 1.01 | 1.19 |
| Cysteine- $^{15}\text{N}$      | 0.01 | 0.21 | 0.41 | 0.61 | 0.01 | 0.98 | 1.19 | 1.40 |
| Glutamine- $^{15}\text{N}$     | 0.01 | 0.21 | 0.41 | 0.61 | 0.01 | 0.98 | 1.19 | 1.40 |
| Phenylalanine- $^{15}\text{N}$ | 0.01 | 0.21 | 0.41 | 0.61 | 0.01 | 0.98 | 1.19 | 1.40 |
| Tryptophan- $^{15}\text{N}$    | 0.01 | 0.21 | 0.41 | 0.61 | 0.01 | 0.98 | 1.19 | 1.40 |
| Proline- $^{15}\text{N}$       | 0.01 | 0.21 | 0.41 | 0.61 | 0.01 | 0.98 | 1.19 | 1.40 |
| Isoleucine- $^{15}\text{N}$    | 0.01 | 0.29 | 0.57 | 0.86 | 0.02 | 1.37 | 1.66 | 1.95 |
| Serine- $^{15}\text{N}$        | 0.01 | 0.30 | 0.59 | 0.89 | 0.02 | 1.42 | 1.72 | 2.02 |
| Threonine- $^{15}\text{N}$     | 0.01 | 0.34 | 0.67 | 1.01 | 0.02 | 1.62 | 1.96 | 2.30 |
| Valine- $^{15}\text{N}$        | 0.01 | 0.37 | 0.73 | 1.11 | 0.02 | 1.76 | 2.14 | 2.51 |
| Leucine- $^{15}\text{N}$       | 0.02 | 0.46 | 0.91 | 1.38 | 0.03 | 2.20 | 2.67 | 3.14 |
| Glutamate- $^{15}\text{N}$     | 0.02 | 0.50 | 0.97 | 1.47 | 0.03 | 2.35 | 2.85 | 3.35 |
| Glycine- $^{15}\text{N}$       | 0.02 | 0.60 | 1.18 | 1.78 | 0.03 | 2.84 | 3.44 | 4.05 |
| Alanine- $^{15}\text{N}$       | 0.03 | 0.77 | 1.52 | 2.30 | 0.04 | 3.67 | 4.45 | 5.23 |
| Aspartic acid- $^{15}\text{N}$ | 0.03 | 0.87 | 1.70 | 2.58 | 0.05 | 4.11 | 4.98 | 5.86 |
| Asparagine- $^{15}\text{N}$    | 0.03 | 0.87 | 1.70 | 2.58 | 0.05 | 4.11 | 4.98 | 5.86 |

**Table S3.** Summary of mass spectrometry parameters used for the different sources.

|                                                | DIP             | ESI             | HESI            |
|------------------------------------------------|-----------------|-----------------|-----------------|
| Flow rate ( $\mu\text{L}/\text{min}$ )         | 1               | 5               | 5               |
| Voltage (kV)                                   | +1.9 / -1.6     | 3.2             | 3.2             |
| $\text{N}_2$ pressure (bar)                    | 5               | -               | -               |
| Capillary Temperature ( $^\circ\text{C}$ )     | 300             | 325             | 325             |
| Sheath Gas                                     | -               | 3               | 3               |
| Auxiliary Gas                                  | -               | 7               | 5               |
| Auxiliary Gas temperature ( $^\circ\text{C}$ ) | -               | -               | 60              |
| Maximum injection time, IT (ms)                | 300             | 50              | 50              |
| Autogain control                               | $1 \times 10^6$ | $1 \times 10^6$ | $1 \times 10^6$ |

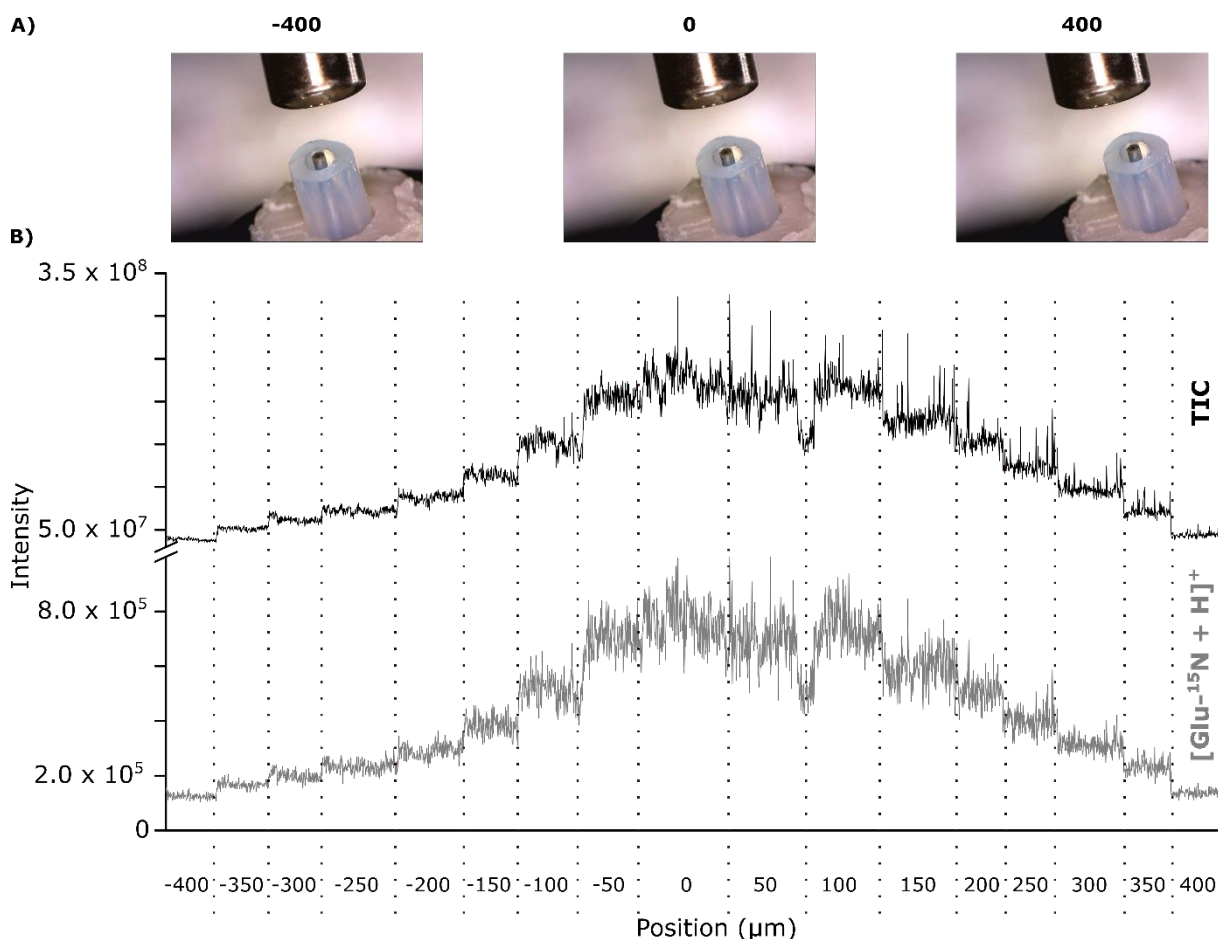

**Figure S1.** The influence of the DIP positioning relative to the MS inlet was evaluated by moving the DIP in steps of 50  $\mu\text{m}$  from left to right. The position at 0  $\mu\text{m}$  represents the alignment of the probe with the center of the inlet, negative values represent motion towards the left side and the positive values motion towards the right side. A) Images from alignment at -400, 0 and 400  $\mu\text{m}$ . B) TIC and  $[\text{Glu-}^{15}\text{N} + \text{H}]^+$  intensity variation depending on probe position in front of the mass spectrometer.

**Note S1.** Parameters used with MZmine2.

Raw files were imported to MSmine 2.53. Mass detection was performed for all files using the scans over 1 min of data and using noise level of 1E3. The building of the chromatograms was done over the whole time of each file with a minimum time span of 0.01 min, minimum height of 1E3, and  $m/z$  tolerance of 0.0002 (or 5 ppm). Peak alignment was performed using the Join alignment method where an  $m/z$  tolerance of 0.0002 (or 5ppm) was considered, the weight for  $m/z$  was 100, the retention time tolerance was 100 min and the weight for retention time was 0. The peak identification was performed with a Custom database search using a file containing identification and theoretical  $m/z$  for different analytes and respective adducts, considering a  $m/z$  tolerance of 0.0002 or 5 ppm and retention time tolerance of 100 min. The results were exported and further analysed in excel.

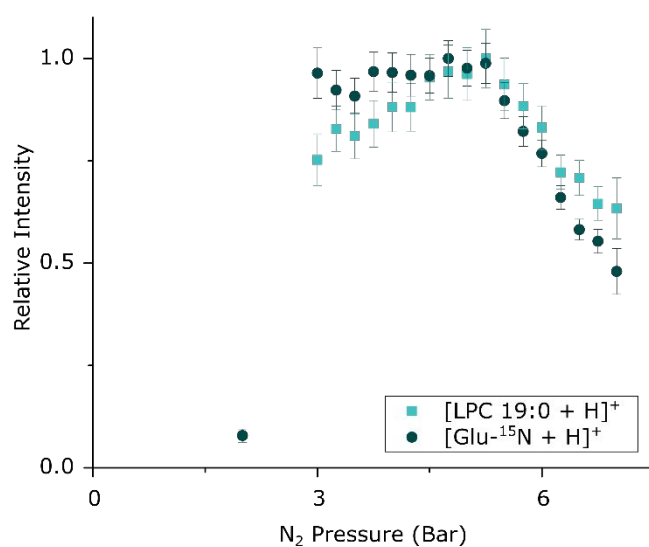

**Figure S2.** The effect of N<sub>2</sub> pressure on the relative intensity of protonated adducts of <sup>15</sup>N-glutamate (circle) and LPC 19:0 (rectangle). The detected intensities are normalized to the highest intensity of each group, specifically, glutamate-<sup>15</sup>N signal at 4.75 Bar and LPC 19:0 at 5.25 Bar. Error bars depict one standard deviation of scan-to-scan extracted ion chromatograms over 1 minute of signal. Standard deviation values are also normalized to the highest intensity of each group.

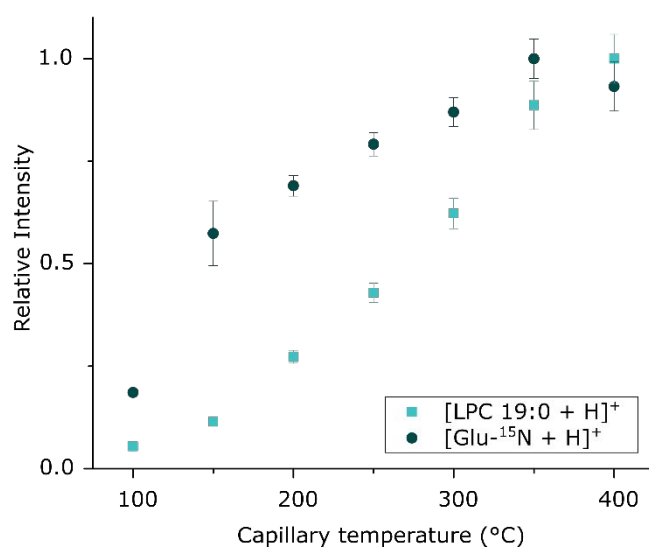

**Figure S3.** Capillary temperature effect on the signal intensity of protonated adducts of glutamate-<sup>15</sup>N (circle) and LPC 19:0 (rectangle). Detected intensities are normalized to the highest intensity of each group, specifically, glutamate-<sup>15</sup>N signal at 350 °C and LPC 19:0 at 400 °C. Error bars depict the standard deviation of scan-to-scan extracted ion chromatograms over 1 minute of signal. Standard deviation values are also normalized to the highest intensity of each group.

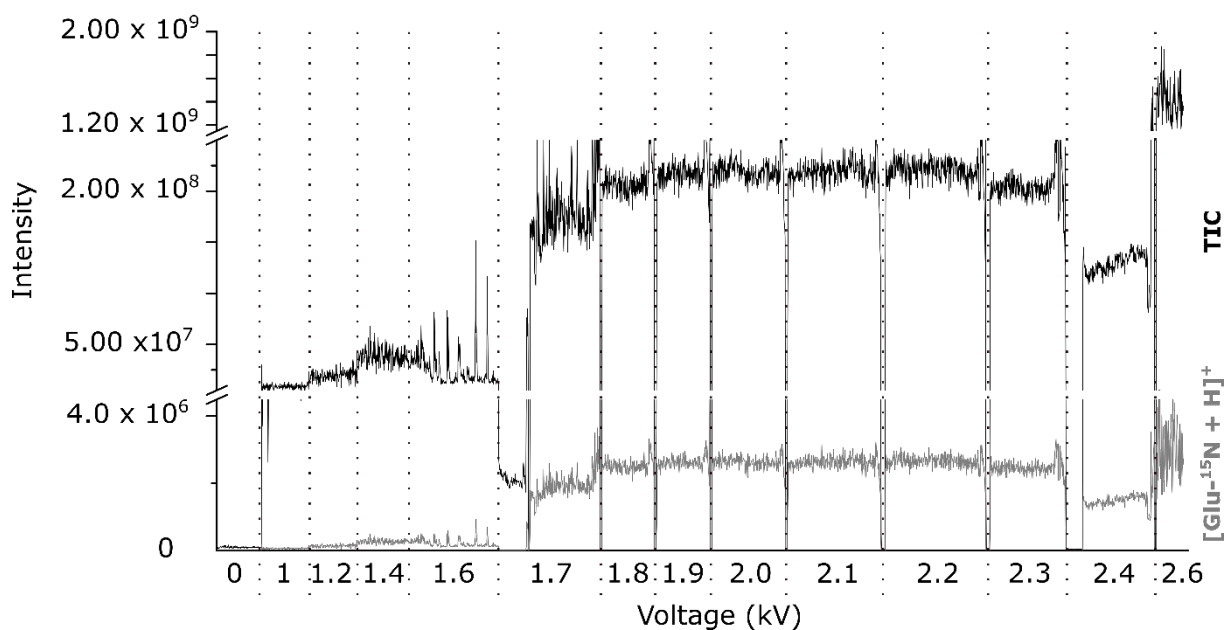

**Figure S4.** Total ion current (TIC) (black) and extracted ion chromatogram of protonated glutamate- $^{15}\text{N}$  (grey) at different voltages (kV) applied to the DIP stainless-steel capillary.

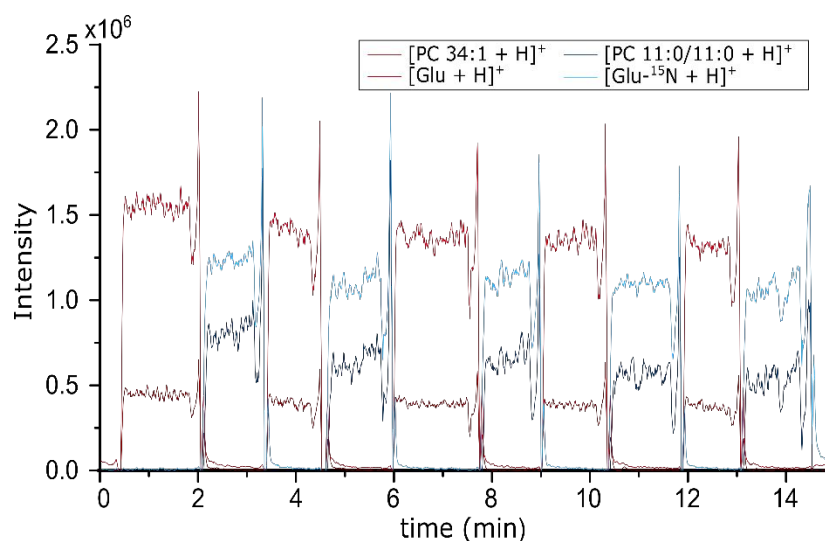

**Figure S5.** DIP-MS in real time of alternating measurements of rat brain extract and standard solution showing the overlaid rolling average of 5 points of the extracted ion chromatograms of protonated endogenous molecules PC 34:1 ( $m/z$  760.5851) and glutamate ( $m/z$  148.0604) in red and the corresponding protonated standards PC 11:0/11:0 ( $m/z$  594.4129) and glutamate- $^{15}\text{N}$  ( $m/z$  149.0575) in blue.

**Table S4.** Carryover values for 10 and 20 scans after switching samples for different endogenous metabolites and standards of two alternated mixtures, respectively.

|                                                    |                                             | Carryover       |                 |
|----------------------------------------------------|---------------------------------------------|-----------------|-----------------|
|                                                    |                                             | Scan no. 10 (%) | Scan no. 20 (%) |
| <i>Rat brain<br/>extract 10-<br/>times diluted</i> | [PC 34:1 + H] <sup>+</sup>                  | 9.6             | 2.1             |
|                                                    | [Glu + H] <sup>+</sup>                      | 5.0             | 3.4             |
|                                                    | [Glucose + Na] <sup>+</sup>                 | 0.2             | 0.2             |
|                                                    | [FA 20:4 + Na] <sup>+</sup>                 | 0.0             | 0.0             |
| <i>IS standard<br/>mixture</i>                     | [PC 11:0/11:0 + H] <sup>+</sup>             | 0.0             | 0.0             |
|                                                    | [Glu- <sup>15</sup> N + H] <sup>+</sup>     | 3.9             | 2.6             |
|                                                    | [Glucose-d <sub>2</sub> + Na] <sup>+</sup>  | 1.2             | 0.8             |
|                                                    | [FA-d <sub>9</sub> 18:1 + Na ] <sup>+</sup> | 0.0             | 0.0             |
|                                                    | <i>Average</i>                              | 2.5             | 1.1             |



**Table S5.** Intra and interday repeatabilities for DIP-MS analysis. The RSD values of intraday analysis were attained from 4 measurements of the same sample within the same day, while interday analysis considers the analysis of the same sample in 3 consecutive days where the DIP was reassembled each day.

|                                              | RSD for raw areas (%) |          | RSD for TIC area correction (%) |          |
|----------------------------------------------|-----------------------|----------|---------------------------------|----------|
|                                              | Intraday              | Interday | Intraday                        | Interday |
| TIC area                                     | 5.1                   | 38.2     |                                 |          |
| [Acetylcholine-d <sub>9</sub> ] <sup>+</sup> | 2.0                   | 19.5     | 3.7                             | 18.4     |
| [Ala- <sup>15</sup> N + H] <sup>+</sup>      | 1.2                   | 25.2     | 5.6                             | 16.1     |
| [Ala- <sup>15</sup> N + Na] <sup>+</sup>     | 3.9                   | 43.7     | 7.9                             | 21.4     |
| [Arg- <sup>15</sup> N + Na] <sup>+</sup>     | 6.9                   | 32.0     | 11.3                            | 9.7      |
| [Asn- <sup>15</sup> N + H] <sup>+</sup>      | 2.0                   | 21.9     | 6.7                             | 31.4     |
| [Asn- <sup>15</sup> N + Na] <sup>+</sup>     | 3.2                   | 29.6     | 7.9                             | 11.3     |
| [Asp- <sup>15</sup> N + H] <sup>+</sup>      | 1.4                   | 19.8     | 5.3                             | 30.5     |
| [Asp- <sup>15</sup> N + Na] <sup>+</sup>     | 3.6                   | 22.0     | 8.1                             | 15.0     |
| [FA 18:1-d <sub>9</sub> + H] <sup>+</sup>    | 9.5                   | 24.2     | 13.5                            | 18.0     |
| [FA 18:1-d <sub>9</sub> + Na] <sup>+</sup>   | 10.8                  | 41.3     | 15.3                            | 27.8     |
| [GABA-d <sub>2</sub> + H] <sup>+</sup>       | 2.0                   | 31.1     | 6.2                             | 6.1      |
| [GABA-d <sub>2</sub> + Na] <sup>+</sup>      | 9.1                   | 50.1     | 13.6                            | 32.5     |
| [Gln- <sup>15</sup> N + H] <sup>+</sup>      | 1.6                   | 20.5     | 5.8                             | 33.5     |
| [Gln- <sup>15</sup> N + Na] <sup>+</sup>     | 4.0                   | 31.3     | 8.6                             | 11.6     |
| [Glu- <sup>15</sup> N + H] <sup>+</sup>      | 2.6                   | 20.9     | 7.5                             | 31.4     |
| [Glu- <sup>15</sup> N + Na] <sup>+</sup>     | 4.0                   | 29.2     | 8.6                             | 12.0     |
| [Glucose-d <sub>2</sub> + Na] <sup>+</sup>   | 8.8                   | 32.9     | 13.2                            | 15.7     |
| [Gly- <sup>15</sup> N + H] <sup>+</sup>      | 1.1                   | 21.9     | 5.4                             | 25.3     |
| [Gly- <sup>15</sup> N + Na] <sup>+</sup>     | 4.2                   | 38.3     | 8.6                             | 15.3     |
| [Leu/Ile- <sup>15</sup> N + H] <sup>+</sup>  | 1.5                   | 28.6     | 5.8                             | 9.6      |
| [Leu/Ile- <sup>15</sup> N + Na] <sup>+</sup> | 4.1                   | 50.9     | 8.3                             | 27.2     |
| [LPC 19:0 + H] <sup>+</sup>                  | 6.3                   | 36.1     | 9.9                             | 11.0     |
| [LPC 19:0 + Na] <sup>+</sup>                 | 11.4                  | 37.9     | 15.9                            | 26.1     |
| [Met- <sup>15</sup> N + H] <sup>+</sup>      | 1.5                   | 24.2     | 5.6                             | 15.2     |
| [Met- <sup>15</sup> N + Na] <sup>+</sup>     | 3.5                   | 44.5     | 7.5                             | 23.4     |
| [PC 11:0/11:0 + H] <sup>+</sup>              | 5.5                   | 32.1     | 8.8                             | 13.4     |
| [PC 11:0/11:0 + Na] <sup>+</sup>             | 8.7                   | 38.3     | 13.2                            | 26.1     |
| [PE 30:0 + Na] <sup>+</sup>                  | 14.3                  | 36.1     | 18.7                            | 31.6     |
| [PG 30:0 + Na] <sup>+</sup>                  | 9.2                   | 8.3      | 13.9                            | 24.5     |
| [Phe- <sup>15</sup> N + H] <sup>+</sup>      | 1.8                   | 24.2     | 6.4                             | 15.3     |
| [Phe- <sup>15</sup> N + Na] <sup>+</sup>     | 4.4                   | 45.3     | 8.7                             | 24.3     |
| [Pro- <sup>15</sup> N + H] <sup>+</sup>      | 0.9                   | 23.3     | 5.4                             | 14.8     |
| [Pro- <sup>15</sup> N + Na] <sup>+</sup>     | 4.0                   | 45.3     | 8.3                             | 21.8     |
| [Ser- <sup>15</sup> N + H] <sup>+</sup>      | 1.7                   | 23.0     | 6.0                             | 27.3     |
| [Ser- <sup>15</sup> N + Na] <sup>+</sup>     | 4.9                   | 32.3     | 9.6                             | 13.0     |
| [Thr- <sup>15</sup> N + H] <sup>+</sup>      | 2.1                   | 22.0     | 7.0                             | 26.0     |
| [Thr- <sup>15</sup> N + Na] <sup>+</sup>     | 3.1                   | 33.7     | 7.6                             | 14.3     |
| [Trp- <sup>15</sup> N + H] <sup>+</sup>      | 4.0                   | 23.7     | 8.5                             | 14.8     |
| [Trp- <sup>15</sup> N + Na] <sup>+</sup>     | 7.0                   | 41.6     | 11.4                            | 21.3     |
| [Tyr- <sup>15</sup> N + H] <sup>+</sup>      | 2.7                   | 22.4     | 7.4                             | 20.6     |
| [Tyr- <sup>15</sup> N + Na] <sup>+</sup>     | 3.7                   | 37.1     | 7.9                             | 17.4     |
| [Val- <sup>15</sup> N + H] <sup>+</sup>      | 1.1                   | 26.7     | 5.3                             | 11.0     |
| [Val- <sup>15</sup> N + Na] <sup>+</sup>     | 3.7                   | 47.9     | 8.1                             | 25.7     |
| <i>Average</i>                               | 4.5                   | 31.2     | 8.8                             | 20.0     |

**Table S6.** Parameters of calibration curves used to determine LOD of DIP, ESI and HESI. In the general trendline of  $y = Sx + b$ , S is the slope of the trendline, and b is the y-intercept.

|                                              | DIP   |        |                | ESI    |        |                | HESI   |        |                |
|----------------------------------------------|-------|--------|----------------|--------|--------|----------------|--------|--------|----------------|
|                                              | S     | b      | R <sup>2</sup> | S      | b      | R <sup>2</sup> | S      | b      | R <sup>2</sup> |
| [Acetylcholine-d <sub>9</sub> ] <sup>+</sup> | 1.8E8 | -1.1E6 | 0.9312         | 1.7E10 | -3.1E8 | 0.9093         | 2.4E10 | -4.6E8 | 0.9202         |
| [Ala- <sup>15</sup> N + H] <sup>+</sup>      | 2.9E6 | 8.1E5  | 0.9546         | 6.4E8  | 1.1E8  | 0.9721         | 7.3E8  | 1.0E8  | 0.9202         |
| [Ala- <sup>15</sup> N + Na] <sup>+</sup>     | 4.4E5 | 1.8E5  | 0.8788         | 2.9E7  | 2.6E7  | 0.7175         | 3.6E7  | 2.6E7  | 0.8205         |
| [Arg- <sup>15</sup> N + H] <sup>+</sup>      | 8.3E6 | -9.7E5 | 0.9471         | 3.0E9  | -3.8E8 | 0.8849         | 3.7E9  | -4.8E8 | 0.8623         |
| [Arg- <sup>15</sup> N + Na] <sup>+</sup>     | 3.6E5 | 9.6E4  | 0.8839         | 7.4E7  | 4.2E6  | 0.7922         | 1.0E8  | 3.4E6  | 0.8531         |
| [Asn- <sup>15</sup> N + H] <sup>+</sup>      | 2.8E5 | 5.0E4  | 0.9595         | 1.2E8  | -2.6E6 | 0.9625         | 1.3E8  | -5.2E6 | 0.9058         |
| [Asn- <sup>15</sup> N + Na] <sup>+</sup>     | 4.3E5 | 9.0E4  | 0.9210         | 8.8E7  | 1.4E7  | 0.9087         | 1.1E8  | 7.9E6  | 0.9060         |
| [Asp- <sup>15</sup> N + H] <sup>+</sup>      | 4.6E5 | 4.1E5  | 0.9384         | 2.4E8  | 6.6E7  | 0.9665         | 2.5E8  | 8.3E7  | 0.8905         |
| [Asp- <sup>15</sup> N + Na] <sup>+</sup>     | 5.6E5 | 3.0E5  | 0.9123         | 9.7E7  | 7.9E7  | 0.8807         | 1.2E8  | 8.0E7  | 0.8785         |
| [FA 18:1-d <sub>9</sub> + H] <sup>+</sup>    | 1.5E5 | -3.2E3 | 0.7107         | 4.0E7  | 5.5E5  | 0.9328         | 3.3E7  | -1.4E5 | 0.6378         |
| [FA 18:1-d <sub>9</sub> + Na] <sup>+</sup>   | 3.2E6 | 5.7E5  | 0.8068         | 2.3E8  | 7.2E7  | 0.5951         | 2.1E8  | 5.2E7  | 0.6020         |
| [GABA-d <sub>2</sub> + H] <sup>+</sup>       | 9.0E6 | 8.2E5  | 0.9523         | 1.4E9  | 1.5E8  | 0.9207         | 1.6E9  | 1.2E8  | 0.9273         |
| [GABA-d <sub>2</sub> + Na] <sup>+</sup>      | 4.3E5 | 9.3E4  | 0.8002         | 4.4E7  | 1.2E7  | 0.6548         | 6.7E7  | 1.1E7  | 0.8032         |
| [Gln- <sup>15</sup> N + H] <sup>+</sup>      | 2.1E6 | 5.6E4  | 0.9656         | 6.1E8  | -8.5E6 | 0.9751         | 6.6E8  | -1.5E7 | 0.9200         |
| [Gln- <sup>15</sup> N + Na] <sup>+</sup>     | 1.5E6 | 8.8E4  | 0.8791         | 2.9E8  | 1.3E7  | 0.8834         | 3.7E8  | 5.3E6  | 0.8955         |
| [Glu- <sup>15</sup> N + H] <sup>+</sup>      | 1.8E6 | 4.5E5  | 0.9664         | 6.5E8  | 6.0E7  | 0.9625         | 7.0E8  | 6.2E7  | 0.9118         |
| [Glu- <sup>15</sup> N + Na] <sup>+</sup>     | 1.0E6 | 2.2E5  | 0.9148         | 1.7E8  | 6.0E7  | 0.8490         | 2.1E8  | 5.9E7  | 0.8781         |
| [Glucose-d <sub>2</sub> + Na] <sup>+</sup>   | 1.7E6 | 5.8E5  | 0.8820         | 3.7E8  | 2.4E8  | 0.7661         | 4.7E8  | 2.8E8  | 0.7928         |
| [Gly- <sup>15</sup> N + H] <sup>+</sup>      | 3.9E5 | 8.9E4  | 0.9337         | 1.3E8  | 6.0E6  | 0.9530         | 1.3E8  | 5.1E6  | 0.9036         |
| [Gly- <sup>15</sup> N + Na] <sup>+</sup>     | 1.8E5 | 9.4E4  | 0.8921         | 1.4E7  | 1.1E7  | 0.7728         | 1.5E7  | 1.0E7  | 0.8450         |
| [His- <sup>15</sup> N + H] <sup>+</sup>      | 3.0E6 | -8.6E4 | 0.8847         | 1.0E9  | -3.6E7 | 0.8262         | 1.2E9  | -4.6E7 | 0.7798         |
| [His- <sup>15</sup> N + Na] <sup>+</sup>     | 6.1E5 | -3.2E4 | 0.8367         | 1.1E8  | -3.5E6 | 0.8110         | 1.5E8  | -4.8E6 | 0.7716         |
| [LPC 19:0 + H] <sup>+</sup>                  | 1.5E6 | -1.4E5 | 0.8803         | 1.0E9  | -3.7E7 | 0.9219         | 1.8E9  | -7.7E7 | 0.8838         |
| [LPC 19:0 + Na] <sup>+</sup>                 | 3.3E6 | 1.6E5  | 0.8494         | 3.0E8  | 4.5E7  | 0.8034         | 4.7E8  | 4.4E7  | 0.8878         |
| [Lys- <sup>15</sup> N + H] <sup>+</sup>      | 1.9E6 | -3.2E5 | 0.8669         | 6.4E8  | -1.0E8 | 0.8267         | 7.2E8  | -1.2E8 | 0.8046         |
| [Lys- <sup>15</sup> N + Na] <sup>+</sup>     | 3.0E5 | -9.6E4 | 0.9214         | 5.4E7  | -9.1E6 | 0.7857         | 8.2E7  | -2.1E7 | 0.8298         |
| [Met- <sup>15</sup> N + H] <sup>+</sup>      | 9.2E6 | 1.8E5  | 0.9433         | 2.5E9  | 3.2E7  | 0.9788         | 2.9E9  | 3.0E7  | 0.9315         |
| [Met- <sup>15</sup> N + Na] <sup>+</sup>     | 2.2E6 | 1.2E5  | 0.8368         | 2.1E8  | 1.6E7  | 0.7419         | 2.8E8  | 1.7E7  | 0.8409         |
| [PC 11:0/11:0 + H] <sup>+</sup>              | 2.1E6 | -4.1E5 | 0.8684         | 1.6E9  | -9.7E7 | 0.9108         | 2.9E9  | -2.5E8 | 0.8709         |
| [PC 11:0/11:0 + Na] <sup>+</sup>             | 3.8E6 | 3.2E5  | 0.8568         | 3.9E8  | 1.4E8  | 0.7253         | 6.2E8  | 1.4E8  | 0.8538         |
| [PE 30:0 + H] <sup>+</sup>                   | 9.2E4 | 1.7E5  | 0.8690         | 9.8E7  | 2.4E7  | 0.9474         | 1.7E8  | 2.8E7  | 0.9263         |
| [PE 30:0 + Na] <sup>+</sup>                  | 2.7E5 | 7.5E5  | 0.7399         | 2.9E7  | 1.2E8  | 0.6402         | 5.5E7  | 1.3E8  | 0.8546         |
| [PG 30:0 + H] <sup>+</sup>                   | -     | -      | -              | 4.2E6  | -2.1E6 | 0.4889         | 6.4E6  | -4.7E6 | 0.7945         |
| [PG 30:0 + Na] <sup>+</sup>                  | 4.5E4 | 6.3E4  | 0.9000         | 1.9E7  | 8.6E6  | 0.9125         | 3.4E7  | 3.2E6  | 0.9101         |
| [Phe- <sup>15</sup> N + H] <sup>+</sup>      | 1.4E7 | 1.1E6  | 0.9491         | 4.7E9  | 1.7E8  | 0.9647         | 5.7E9  | 1.6E8  | 0.9221         |
| [Phe- <sup>15</sup> N + Na] <sup>+</sup>     | 3.6E6 | 4.0E5  | 0.8592         | 3.7E8  | 7.5E7  | 0.7155         | 5.2E8  | 7.8E7  | 0.8234         |
| [Pro- <sup>15</sup> N + H] <sup>+</sup>      | 1.2E7 | 6.0E5  | 0.9407         | 2.8E9  | 6.5E7  | 0.9660         | 3.5E9  | 3.0E7  | 0.9069         |
| [Pro- <sup>15</sup> N + Na] <sup>+</sup>     | 5.8E6 | 6.1E5  | 0.8073         | 3.7E8  | 8.6E7  | 0.6756         | 5.0E8  | 9.0E7  | 0.8058         |
| [Ser- <sup>15</sup> N + H] <sup>+</sup>      | 5.4E5 | 7.0E4  | 0.9475         | 2.3E8  | 5.3E6  | 0.9605         | 2.6E8  | 2.9E6  | 0.9075         |
| [Ser- <sup>15</sup> N + Na] <sup>+</sup>     | 5.8E5 | 1.2E5  | 0.8970         | 8.8E7  | 2.0E7  | 0.8572         | 1.0E8  | 2.0E7  | 0.8792         |
| [Thr- <sup>15</sup> N + H] <sup>+</sup>      | 1.3E6 | 1.6E5  | 0.9568         | 5.3E8  | 2.6E7  | 0.9783         | 6.0E8  | 2.3E7  | 0.9253         |
| [Thr- <sup>15</sup> N + Na] <sup>+</sup>     | 1.2E6 | 2.0E5  | 0.8857         | 1.6E8  | 3.3E7  | 0.8449         | 1.9E8  | 3.3E7  | 0.8722         |
| [Trp- <sup>15</sup> N + H] <sup>+</sup>      | 6.1E6 | 7.6E5  | 0.9479         | 2.4E9  | 1.3E8  | 0.9591         | 2.9E9  | 1.1E8  | 0.9258         |
| [Trp- <sup>15</sup> N + Na] <sup>+</sup>     | 1.9E6 | 4.7E5  | 0.8101         | 3.4E8  | 5.3E7  | 0.7739         | 4.5E8  | 5.5E7  | 0.8410         |
| [Tyr- <sup>15</sup> N + H] <sup>+</sup>      | 4.9E6 | 2.4E5  | 0.9816         | 2.2E9  | 2.5E7  | 0.9709         | 2.5E9  | 2.5E7  | 0.9266         |
| [Tyr- <sup>15</sup> N + Na] <sup>+</sup>     | 1.6E6 | 8.5E4  | 0.8839         | 2.7E8  | 1.6E7  | 0.8609         | 3.5E8  | 1.5E7  | 0.8919         |
| [Val- <sup>15</sup> N + H] <sup>+</sup>      | 9.8E6 | 1.3E6  | 0.9477         | 2.3E9  | 1.8E8  | 0.9699         | 2.7E9  | 1.7E8  | 0.9285         |
| [Val- <sup>15</sup> N + Na] <sup>+</sup>     | 2.4E6 | 4.0E5  | 0.8749         | 1.6E8  | 6.3E7  | 0.6873         | 2.1E8  | 6.2E7  | 0.8055         |

**Table S7.** Slope of calibration curve, S, and standard deviation of the linear regression line residuals,  $\sigma$ , values used to calculate LOD of DIP, ESI and HESI according to Eq.2.

|                                              | DIP   |          | ESI    |          | HESI   |          |
|----------------------------------------------|-------|----------|--------|----------|--------|----------|
|                                              | S     | $\sigma$ | S      | $\sigma$ | S      | $\sigma$ |
| [Acetylcholine-d <sub>9</sub> ] <sup>+</sup> | 1.8E8 | 5.92E6   | 1.7E10 | 6.52E8   | 2.4E10 | 8.50E8   |
| [Ala- <sup>15</sup> N + H] <sup>+</sup>      | 2.9E6 | 1.12E6   | 6.4E8  | 1.92E8   | 7.3E8  | 3.78E8   |
| [Ala- <sup>15</sup> N + Na] <sup>+</sup>     | 4.4E5 | 2.66E5   | 2.9E7  | 3.18E7   | 3.6E7  | 2.98E7   |
| [Arg- <sup>15</sup> N + H] <sup>+</sup>      | 8.3E6 | 6.74E5   | 3.0E9  | 3.80E8   | 3.7E9  | 5.27E8   |
| [Arg- <sup>15</sup> N + Na] <sup>+</sup>     | 3.6E5 | 4.59E4   | 7.4E7  | 1.35E7   | 1.0E8  | 1.53E7   |
| [Asn- <sup>15</sup> N + H] <sup>+</sup>      | 2.8E5 | 1.14E5   | 1.2E8  | 4.66E7   | 1.3E8  | 8.31E7   |
| [Asn- <sup>15</sup> N + Na] <sup>+</sup>     | 4.3E5 | 2.30E5   | 8.8E7  | 5.49E7   | 1.1E8  | 6.75E7   |
| [Asp- <sup>15</sup> N + H] <sup>+</sup>      | 4.6E5 | 2.35E5   | 2.4E8  | 8.69E7   | 2.5E8  | 1.71E8   |
| [Asp- <sup>15</sup> N + Na] <sup>+</sup>     | 5.6E5 | 3.35E5   | 9.7E7  | 7.04E7   | 1.2E8  | 8.49E7   |
| [FA 18:1-d <sub>9</sub> + H] <sup>+</sup>    | 1.5E5 | 1.69E4   | 4.0E7  | 2.19E6   | 3.3E7  | 5.18E6   |
| [FA 18:1-d <sub>9</sub> + Na] <sup>+</sup>   | 3.2E6 | 3.70E5   | 2.3E8  | 4.40E7   | 2.1E8  | 3.98E7   |
| [GABA-d <sub>2</sub> + H] <sup>+</sup>       | 9.0E6 | 1.57E6   | 1.4E9  | 3.08E8   | 1.6E9  | 3.56E8   |
| [GABA-d <sub>2</sub> + Na] <sup>+</sup>      | 4.3E5 | 1.47E5   | 4.4E7  | 2.50E7   | 6.7E7  | 2.56E7   |
| [Gln- <sup>15</sup> N + H] <sup>+</sup>      | 2.1E6 | 1.74E5   | 6.1E8  | 4.61E7   | 6.6E8  | 9.20E7   |
| [Gln- <sup>15</sup> N + Na] <sup>+</sup>     | 1.5E6 | 2.34E5   | 2.9E8  | 5.02E7   | 3.7E8  | 5.97E7   |
| [Glu- <sup>15</sup> N + H] <sup>+</sup>      | 1.8E6 | 3.81E5   | 6.5E8  | 1.45E8   | 7.0E8  | 2.45E8   |
| [Glu- <sup>15</sup> N + Na] <sup>+</sup>     | 1.0E6 | 3.42E5   | 1.7E8  | 7.96E7   | 2.1E8  | 8.73E7   |
| [Glucose-d <sub>2</sub> + Na] <sup>+</sup>   | 1.7E6 | 7.70E5   | 3.7E8  | 2.58E8   | 4.7E8  | 3.09E8   |
| [Gly- <sup>15</sup> N + H] <sup>+</sup>      | 3.9E5 | 1.25E5   | 1.3E8  | 3.91E7   | 1.3E8  | 5.89E7   |
| [Gly- <sup>15</sup> N + Na] <sup>+</sup>     | 1.8E5 | 7.45E4   | 1.4E7  | 1.01E7   | 1.5E7  | 8.82E6   |
| [His- <sup>15</sup> N + H] <sup>+</sup>      | 3.0E6 | 1.23E5   | 1.0E9  | 5.62E7   | 1.2E9  | 7.72E7   |
| [His- <sup>15</sup> N + Na] <sup>+</sup>     | 6.1E5 | 2.18E4   | 1.1E8  | 6.23E6   | 1.5E8  | 9.58E6   |
| [LPC 19:0 + H] <sup>+</sup>                  | 1.5E6 | 1.37E5   | 1.0E9  | 7.51E7   | 1.8E9  | 1.80E8   |
| [LPC 19:0 + Na] <sup>+</sup>                 | 3.3E6 | 3.70E5   | 3.0E8  | 4.11E7   | 4.7E8  | 4.64E7   |
| [Lys- <sup>15</sup> N + H] <sup>+</sup>      | 1.9E6 | 2.74E5   | 6.4E8  | 1.17E8   | 7.2E8  | 1.42E8   |
| [Lys- <sup>15</sup> N + Na] <sup>+</sup>     | 3.0E5 | 2.55E4   | 5.4E7  | 1.10E7   | 8.2E7  | 1.25E7   |
| [Met- <sup>15</sup> N + H] <sup>+</sup>      | 9.2E6 | 4.10E5   | 2.5E9  | 6.99E7   | 2.9E9  | 1.50E8   |
| [Met- <sup>15</sup> N + Na] <sup>+</sup>     | 2.2E6 | 1.64E5   | 2.1E8  | 2.36E7   | 2.8E8  | 2.32E7   |
| [PC 11:0/11:0 + H] <sup>+</sup>              | 2.1E6 | 4.10E5   | 1.6E9  | 2.78E8   | 2.9E9  | 6.28E8   |
| [PC 11:0/11:0 + Na] <sup>+</sup>             | 3.8E6 | 8.89E5   | 3.9E8  | 1.35E8   | 6.2E8  | 1.46E8   |
| [PE 30:0 + H] <sup>+</sup>                   | 9.2E4 | 8.36E4   | 9.8E7  | 6.22E7   | 1.7E8  | 1.28E8   |
| [PE 30:0 + Na] <sup>+</sup>                  | 2.7E5 | 4.29E5   | 2.9E7  | 5.83E7   | 5.5E7  | 6.09E7   |
| [PG 30:0 + H] <sup>+</sup>                   | 2.0E3 | 3.66E4   | 4.2E6  | 8.11E6   | 6.4E6  | 7.14E6   |
| [PG 30:0 + Na] <sup>+</sup>                  | 4.5E4 | 3.32E4   | 1.9E7  | 1.32E7   | 3.4E7  | 2.31E7   |
| [Phe- <sup>15</sup> N + H] <sup>+</sup>      | 1.4E7 | 1.53E6   | 4.7E9  | 4.20E8   | 5.7E9  | 7.77E8   |
| [Phe- <sup>15</sup> N + Na] <sup>+</sup>     | 3.6E6 | 6.72E5   | 3.7E8  | 1.11E8   | 5.2E8  | 1.13E8   |
| [Pro- <sup>15</sup> N + H] <sup>+</sup>      | 1.2E7 | 1.45E6   | 2.8E9  | 2.48E8   | 3.5E9  | 5.22E8   |
| [Pro- <sup>15</sup> N + Na] <sup>+</sup>     | 5.8E6 | 1.34E6   | 3.7E8  | 1.20E8   | 5.0E8  | 1.15E8   |
| [Ser- <sup>15</sup> N + H] <sup>+</sup>      | 5.4E5 | 8.41E4   | 2.3E8  | 3.23E7   | 2.6E8  | 5.59E7   |
| [Ser- <sup>15</sup> N + Na] <sup>+</sup>     | 5.8E5 | 1.18E5   | 8.8E7  | 2.46E7   | 1.0E8  | 2.58E7   |
| [Thr- <sup>15</sup> N + H] <sup>+</sup>      | 1.3E6 | 2.12E5   | 5.3E8  | 6.13E7   | 6.0E8  | 1.33E8   |
| [Thr- <sup>15</sup> N + Na] <sup>+</sup>     | 1.2E6 | 2.99E5   | 1.6E8  | 5.27E7   | 1.9E8  | 5.68E7   |
| [Trp- <sup>15</sup> N + H] <sup>+</sup>      | 6.1E6 | 6.78E5   | 2.4E9  | 2.30E8   | 2.9E9  | 3.89E8   |
| [Trp- <sup>15</sup> N + Na] <sup>+</sup>     | 1.9E6 | 4.01E5   | 3.4E8  | 8.58E7   | 4.5E8  | 9.17E7   |
| [Tyr- <sup>15</sup> N + H] <sup>+</sup>      | 4.9E6 | 1.59E5   | 2.2E9  | 8.84E7   | 2.5E9  | 1.69E8   |
| [Tyr- <sup>15</sup> N + Na] <sup>+</sup>     | 1.6E6 | 1.23E5   | 2.7E8  | 2.53E7   | 3.5E8  | 2.83E7   |
| [Val- <sup>15</sup> N + H] <sup>+</sup>      | 9.8E6 | 1.96E6   | 2.3E9  | 3.39E8   | 2.7E9  | 6.28E8   |
| [Val- <sup>15</sup> N + Na] <sup>+</sup>     | 2.4E6 | 7.64E5   | 1.6E8  | 9.02E7   | 2.1E8  | 8.60E7   |

**Table S8.** Rounded LOD values and respective rounded fold-changes for DIP, ESI and HESI. Positive values for the fold change display a lower LOD for DIP, and negative values a lower LOD for ESI or HESI.

|                                              | LOD ( $\mu\text{M}$ ) |      |      | Fold Change |       |
|----------------------------------------------|-----------------------|------|------|-------------|-------|
|                                              | DIP                   | ESI  | HESI | ESI         | HESI  |
| [Acetylcholine-d <sub>9</sub> ] <sup>+</sup> | 0.11                  | 0.13 | 0.12 | 0.16        | 0.08  |
| [Ala- <sup>15</sup> N + H] <sup>+</sup>      | 1.27                  | 0.99 | 1.72 | -0.22       | 0.35  |
| [Ala- <sup>15</sup> N + Na] <sup>+</sup>     | 2.01                  | 3.66 | 2.73 | 0.82        | 0.35  |
| [Arg- <sup>15</sup> N + H] <sup>+</sup>      | 0.27                  | 0.42 | 0.47 | 0.57        | 0.74  |
| [Arg- <sup>15</sup> N + Na] <sup>+</sup>     | 0.42                  | 0.60 | 0.48 | 0.41        | 0.14  |
| [Asn- <sup>15</sup> N + H] <sup>+</sup>      | 1.34                  | 1.29 | 2.11 | -0.04       | 0.57  |
| [Asn- <sup>15</sup> N + Na] <sup>+</sup>     | 1.78                  | 2.07 | 2.10 | 0.16        | 0.18  |
| [Asp- <sup>15</sup> N + H] <sup>+</sup>      | 1.67                  | 1.21 | 2.29 | -0.27       | 0.37  |
| [Asp- <sup>15</sup> N + Na] <sup>+</sup>     | 1.96                  | 2.40 | 2.43 | 0.22        | 0.24  |
| [FA 18:1-d <sub>9</sub> + H] <sup>+</sup>    | 0.37                  | 0.18 | 0.51 | -0.51       | 0.38  |
| [FA 18:1-d <sub>9</sub> + Na] <sup>+</sup>   | 0.38                  | 0.64 | 0.63 | 0.69        | 0.66  |
| [GABA-d <sub>2</sub> + H] <sup>+</sup>       | 0.57                  | 0.75 | 0.72 | 0.31        | 0.25  |
| [GABA-d <sub>2</sub> + Na] <sup>+</sup>      | 1.12                  | 1.86 | 1.27 | 0.66        | 0.13  |
| [Gln- <sup>15</sup> N + H] <sup>+</sup>      | 0.27                  | 0.25 | 0.46 | -0.09       | 0.68  |
| [Gln- <sup>15</sup> N + Na] <sup>+</sup>     | 0.51                  | 0.56 | 0.53 | 0.12        | 0.05  |
| [Glu- <sup>15</sup> N + H] <sup>+</sup>      | 0.70                  | 0.74 | 1.16 | 0.06        | 0.67  |
| [Glu- <sup>15</sup> N + Na] <sup>+</sup>     | 1.10                  | 1.57 | 1.39 | 0.43        | 0.26  |
| [Glucose-d <sub>2</sub> + Na] <sup>+</sup>   | 1.54                  | 2.32 | 2.15 | 0.51        | 0.40  |
| [Gly- <sup>15</sup> N + H] <sup>+</sup>      | 1.05                  | 1.00 | 1.47 | -0.05       | 0.40  |
| [Gly- <sup>15</sup> N + Na] <sup>+</sup>     | 1.37                  | 2.44 | 1.93 | 0.78        | 0.41  |
| [His + H] <sup>+</sup>                       | 0.14                  | 0.18 | 0.21 | 0.31        | 0.52  |
| [His + Na] <sup>+</sup>                      | 0.12                  | 0.18 | 0.21 | 0.55        | 0.80  |
| [LPC 19:0 + H] <sup>+</sup>                  | 0.30                  | 0.25 | 0.33 | -0.16       | 0.12  |
| [LPC 19:0 + Na] <sup>+</sup>                 | 0.37                  | 0.45 | 0.33 | 0.21        | -0.13 |
| [Lys- <sup>15</sup> N + H] <sup>+</sup>      | 0.48                  | 0.60 | 0.65 | 0.26        | 0.35  |
| [Lys- <sup>15</sup> N + Na] <sup>+</sup>     | 0.28                  | 0.67 | 0.51 | 1.39        | 0.81  |
| [Met- <sup>15</sup> N + H] <sup>+</sup>      | 0.15                  | 0.09 | 0.17 | -0.38       | 0.14  |
| [Met- <sup>15</sup> N + Na] <sup>+</sup>     | 0.24                  | 0.37 | 0.27 | 0.52        | 0.12  |
| [PC 11:0/11:0 + H] <sup>+</sup>              | 0.64                  | 0.58 | 0.72 | -0.08       | 0.13  |
| [PC 11:0/11:0 + Na] <sup>+</sup>             | 0.76                  | 1.15 | 0.77 | 0.51        | 0.01  |
| [PE 30:0 + H] <sup>+</sup>                   | 3.01                  | 2.09 | 2.50 | -0.31       | -0.17 |
| [PE 30:0 + Na] <sup>+</sup>                  | 5.25                  | 6.64 | 3.65 | 0.26        | -0.30 |
| [PG 30:0 + H] <sup>+</sup>                   | -                     | 6.35 | 3.68 | -           | -     |
| [PG 30:0 + Na] <sup>+</sup>                  | 2.41                  | 2.24 | 2.28 | -0.07       | -0.06 |
| [Phe- <sup>15</sup> N + H] <sup>+</sup>      | 0.36                  | 0.30 | 0.45 | -0.17       | 0.25  |
| [Phe- <sup>15</sup> N + Na] <sup>+</sup>     | 0.61                  | 0.98 | 0.72 | 0.61        | 0.18  |
| [Pro- <sup>15</sup> N + H] <sup>+</sup>      | 0.39                  | 0.29 | 0.50 | -0.25       | 0.28  |
| [Pro- <sup>15</sup> N + Na] <sup>+</sup>     | 0.76                  | 1.08 | 0.76 | 0.42        | 0.00  |
| [Ser- <sup>15</sup> N + H] <sup>+</sup>      | 0.51                  | 0.46 | 0.72 | -0.11       | 0.40  |
| [Ser- <sup>15</sup> N + Na] <sup>+</sup>     | 0.67                  | 0.92 | 0.84 | 0.38        | 0.25  |
| [Thr- <sup>15</sup> N + H] <sup>+</sup>      | 0.55                  | 0.38 | 0.73 | -0.30       | 0.34  |
| [Thr- <sup>15</sup> N + Na] <sup>+</sup>     | 0.81                  | 1.10 | 0.98 | 0.36        | 0.22  |
| [Trp- <sup>15</sup> N + H] <sup>+</sup>      | 0.36                  | 0.32 | 0.44 | -0.12       | 0.21  |
| [Trp- <sup>15</sup> N + Na] <sup>+</sup>     | 0.70                  | 0.84 | 0.68 | 0.20        | -0.03 |
| [Tyr- <sup>15</sup> N + H] <sup>+</sup>      | 0.11                  | 0.13 | 0.22 | 0.26        | 1.05  |
| [Tyr- <sup>15</sup> N + Na] <sup>+</sup>     | 0.25                  | 0.31 | 0.27 | 0.27        | 0.10  |
| [Val- <sup>15</sup> N + H] <sup>+</sup>      | 0.66                  | 0.49 | 0.78 | -0.25       | 0.18  |
| [Val- <sup>15</sup> N + Na] <sup>+</sup>     | 1.06                  | 1.89 | 1.37 | 0.78        | 0.30  |
| <i>Average</i>                               | 0.89                  | 1.18 | 1.09 | 0.21        | 0.28  |

**Table S9.** List of putative assignments of a methanolic rat brain extract analyzed with DIP-MS. Contains 218 features which corresponds to 120 metabolites when adducts are combined.

| Putative annotations      | Adduct                                  | Theoretical m/z | Experimental m/z | $\Delta$ ppm |
|---------------------------|-----------------------------------------|-----------------|------------------|--------------|
| <i>Phosphoglycerate</i>   | [M + H] <sup>+</sup>                    | 187.0002        | 187.0002         | 0.24         |
| <i>6-phosphogluconate</i> | [M + H] <sup>+</sup>                    | 277.0319        | 277.0324         | 1.78         |
| <i>Acetylcholine</i>      | [M] <sup>+</sup>                        | 146.1176        | 146.1176         | -0.21        |
| <i>Adenine</i>            | [M + H] <sup>+</sup>                    | 136.0618        | 136.0618         | -0.35        |
| <i>Adenosine</i>          | [M + H] <sup>+</sup>                    | 268.1040        | 268.1042         | 0.93         |
|                           | [M + Na] <sup>+</sup>                   | 290.0860        | 290.0849         | -3.69        |
| <i>Adipic acid</i>        | [M + K] <sup>+</sup>                    | 185.0212        | 185.0209         | -1.60        |
| <i>Ala</i>                | [M + H] <sup>+</sup>                    | 90.0550         | 90.0551          | 1.66         |
|                           | [M + Na] <sup>+</sup>                   | 112.0369        | 112.0371         | 1.80         |
|                           | [M + K] <sup>+</sup>                    | 128.0110        | 128.0110         | -0.35        |
| <i>Arg</i>                | [M + H] <sup>+</sup>                    | 175.1190        | 175.1188         | -0.98        |
| <i>Asn</i>                | [M + H] <sup>+</sup>                    | 133.0608        | 133.0607         | -1.04        |
|                           | [M + Na] <sup>+</sup>                   | 155.0428        | 155.0427         | -0.83        |
|                           | [M + K] <sup>+</sup>                    | 171.0167        | 171.0166         | -0.31        |
| <i>Asp</i>                | [M + H] <sup>+</sup>                    | 134.0448        | 134.0447         | -0.91        |
|                           | [M + Na] <sup>+</sup>                   | 156.0268        | 156.0267         | -0.82        |
|                           | [M + K] <sup>+</sup>                    | 172.0008        | 172.0006         | -0.93        |
| <i>C16 carnitine</i>      | [M + H] <sup>+</sup>                    | 400.3421        | 400.3421         | -0.07        |
| <i>C18:2 carnitine</i>    | [M + Na] <sup>+</sup>                   | 446.3241        | 446.3262         | 4.78         |
| <i>C2 carnitine</i>       | [M + H] <sup>+</sup>                    | 204.1230        | 204.1230         | -0.07        |
| <i>Carnitine</i>          | [M + H] <sup>+</sup>                    | 162.1125        | 162.1124         | -0.69        |
|                           | [M + Na] <sup>+</sup>                   | 184.0944        | 184.0944         | -0.22        |
|                           | [M + K] <sup>+</sup>                    | 200.0684        | 200.0682         | -0.81        |
| <i>Carnosine</i>          | [M + H] <sup>+</sup>                    | 227.1139        | 227.1141         | 0.90         |
| <i>Cholesterol</i>        | [M + H - H <sub>2</sub> O] <sup>+</sup> | 369.3516        | 369.3514         | -0.49        |
| <i>Choline</i>            | [M] <sup>+</sup>                        | 104.1070        | 104.1073         | 2.66         |
| <i>Cit</i>                | [M + H] <sup>+</sup>                    | 176.1030        | 176.1028         | -0.97        |
|                           | [M + K] <sup>+</sup>                    | 214.0588        | 214.0587         | -0.52        |
| <i>Citrate</i>            | [M + K] <sup>+</sup>                    | 230.9903        | 230.9904         | 0.61         |
| <i>c-LPA 18:2</i>         | [M + H] <sup>+</sup>                    | 417.2406        | 417.2401         | -1.32        |
| <i>Creatine</i>           | [M + H] <sup>+</sup>                    | 132.0768        | 132.0767         | -0.71        |
|                           | [M + Na] <sup>+</sup>                   | 154.0588        | 154.0587         | -0.89        |
|                           | [M + K] <sup>+</sup>                    | 170.0328        | 170.0325         | -1.67        |
| <i>Creatinine</i>         | [M + H] <sup>+</sup>                    | 114.0662        | 114.0664         | 1.51         |
|                           | [M + Na] <sup>+</sup>                   | 136.0482        | 136.0480         | -1.44        |
|                           | [M + K] <sup>+</sup>                    | 152.0222        | 152.0221         | -0.39        |
| <i>DHAP</i>               | [M + H] <sup>+</sup>                    | 171.0053        | 171.0054         | 0.50         |
| <i>Erythritol</i>         | [M + K] <sup>+</sup>                    | 161.0212        | 161.0211         | -0.70        |
| <i>FA 18:1</i>            | [M + K] <sup>+</sup>                    | 321.2195        | 321.2192         | -0.81        |
| <i>FA 20:4</i>            | [M + Na] <sup>+</sup>                   | 327.2300        | 327.2296         | -1.18        |
|                           | [M + K] <sup>+</sup>                    | 343.2039        | 343.2034         | -1.41        |
| <i>FA 20:5</i>            | [M + Na] <sup>+</sup>                   | 325.2143        | 325.2141         | -0.63        |
| <i>FA 22:4</i>            | [M + K] <sup>+</sup>                    | 371.2352        | 371.2346         | -1.52        |
| <i>FA 22:6</i>            | [M + Na] <sup>+</sup>                   | 351.2294        | 351.2295         | 0.22         |
|                           | [M + K] <sup>+</sup>                    | 367.2033        | 367.2035         | 0.60         |
| <i>GABA</i>               | [M + H] <sup>+</sup>                    | 104.0706        | 104.0709         | 2.96         |
|                           | [M + Na] <sup>+</sup>                   | 126.0526        | 126.0526         | -0.36        |
|                           | [M + K] <sup>+</sup>                    | 142.0266        | 142.0266         | 0.19         |
| <i>Gln</i>                | [M + H] <sup>+</sup>                    | 147.0764        | 147.0764         | 0.21         |
|                           | [M + Na] <sup>+</sup>                   | 169.0584        | 169.0583         | -0.79        |
|                           | [M + K] <sup>+</sup>                    | 185.0324        | 185.0323         | -0.77        |
| <i>Glu</i>                | [M + H] <sup>+</sup>                    | 148.0604        | 148.0604         | 0.17         |
|                           | [M + Na] <sup>+</sup>                   | 170.0424        | 170.0422         | -1.01        |
|                           | [M + K] <sup>+</sup>                    | 186.0164        | 186.0161         | -1.40        |
| <i>Glucosamine</i>        | [M + H] <sup>+</sup>                    | 180.0866        | 180.0866         | -0.04        |
| <i>Glucose</i>            | [M + Na] <sup>+</sup>                   | 203.0526        | 203.0523         | -1.25        |
|                           | [M + K] <sup>+</sup>                    | 219.0265        | 219.0267         | 0.75         |
| <i>Gly</i>                | [M + H] <sup>+</sup>                    | 76.0393         | 76.0393          | 0.54         |
|                           | [M + Na] <sup>+</sup>                   | 98.0212         | 98.0215          | 3.25         |
|                           | [M + K] <sup>+</sup>                    | 113.9953        | 113.9955         | 1.34         |
| <i>Glycerol phosphate</i> | [M + H] <sup>+</sup>                    | 173.0210        | 173.0209         | -0.33        |

|                             |                       |          |          |       |
|-----------------------------|-----------------------|----------|----------|-------|
| <i>Glycerol</i>             | [M + K] <sup>+</sup>  | 131.0105 | 131.0105 | -0.13 |
| <i>Guanosine</i>            | [M + K] <sup>+</sup>  | 322.0549 | 322.0552 | 1.05  |
| <i>Caproic acid</i>         | [M + Na] <sup>+</sup> | 139.0730 | 139.0728 | -1.50 |
|                             | [M + K] <sup>+</sup>  | 155.0470 | 155.0468 | -1.25 |
| <i>His</i>                  | [M + H] <sup>+</sup>  | 156.0768 | 156.0767 | -0.46 |
|                             | [M + Na] <sup>+</sup> | 178.0587 | 178.0585 | -0.85 |
|                             | [M + K] <sup>+</sup>  | 194.0326 | 194.0326 | -0.04 |
| <i>Homocarnosine</i>        | [M + H] <sup>+</sup>  | 241.1295 | 241.1297 | 0.95  |
| <i>Homocysteine</i>         | [M + K] <sup>+</sup>  | 173.9986 | 173.9988 | 1.12  |
| <i>Hydroxyproline</i>       | [M + Na] <sup>+</sup> | 154.0475 | 154.0475 | -0.32 |
| <i>Hypoxanthine</i>         | [M + H] <sup>+</sup>  | 137.0458 | 137.0457 | -1.01 |
|                             | [M + Na] <sup>+</sup> | 159.0278 | 159.0277 | -0.71 |
|                             | [M + K] <sup>+</sup>  | 175.0018 | 175.0015 | -1.44 |
| <i>Inosine</i>              | [M + H] <sup>+</sup>  | 269.0880 | 269.0883 | 1.07  |
|                             | [M + Na] <sup>+</sup> | 291.0700 | 291.0701 | 0.21  |
|                             | [M + K] <sup>+</sup>  | 307.0440 | 307.0442 | 0.52  |
| <i>Lactate</i>              | [M + Na] <sup>+</sup> | 113.0210 | 113.0211 | 0.98  |
|                             | [M + K] <sup>+</sup>  | 128.9950 | 128.9949 | -1.04 |
| <i>Leu</i>                  | [M + H] <sup>+</sup>  | 132.1019 | 132.1018 | -0.59 |
|                             | [M + Na] <sup>+</sup> | 154.0839 | 154.0838 | -0.54 |
|                             | [M + K] <sup>+</sup>  | 170.0578 | 170.0577 | -0.36 |
| <i>LPC 16:0</i>             | [M + H] <sup>+</sup>  | 496.3403 | 496.3393 | -2.09 |
|                             | [M + Na] <sup>+</sup> | 518.3222 | 518.3205 | -3.29 |
|                             | [M + K] <sup>+</sup>  | 534.2962 | 534.2949 | -2.39 |
| <i>LPC 18:0</i>             | [M + K] <sup>+</sup>  | 562.3275 | 562.3271 | -0.63 |
| <i>LPC 18:1</i>             | [M + H] <sup>+</sup>  | 522.3559 | 522.3548 | -2.11 |
|                             | [M + Na] <sup>+</sup> | 544.3379 | 544.3365 | -2.48 |
|                             | [M + K] <sup>+</sup>  | 560.3118 | 560.3113 | -0.93 |
| <i>LPC 20:0</i>             | [M + H] <sup>+</sup>  | 552.4029 | 552.4017 | -2.11 |
| <i>LPC 20:4</i>             | [M + Na] <sup>+</sup> | 566.3222 | 566.3218 | -0.75 |
|                             | [M + K] <sup>+</sup>  | 582.2962 | 582.2956 | -1.04 |
| <i>LPC 22:6</i>             | [M + K] <sup>+</sup>  | 606.2962 | 606.2956 | -1.00 |
| <i>LPE 18:0</i>             | [M + K] <sup>+</sup>  | 520.2805 | 520.2794 | -2.08 |
| <i>LPE 20:4</i>             | [M + Na] <sup>+</sup> | 524.2753 | 524.2740 | -2.50 |
|                             | [M + K] <sup>+</sup>  | 540.2492 | 540.2480 | -2.25 |
| <i>LPE 22:6</i>             | [M + Na] <sup>+</sup> | 548.2753 | 548.2738 | -2.81 |
|                             | [M + K] <sup>+</sup>  | 564.2492 | 564.2487 | -0.85 |
| <i>Lys</i>                  | [M + H] <sup>+</sup>  | 147.1128 | 147.1128 | 0.06  |
|                             | [M + K] <sup>+</sup>  | 185.0688 | 185.0686 | -1.02 |
| <i>Malate</i>               | [M + Na] <sup>+</sup> | 157.0108 | 157.0107 | -0.61 |
|                             | [M + K] <sup>+</sup>  | 172.9848 | 172.9847 | -0.69 |
| <i>Met</i>                  | [M + H] <sup>+</sup>  | 150.0583 | 150.0583 | 0.23  |
|                             | [M + Na] <sup>+</sup> | 172.0403 | 172.0402 | -0.72 |
|                             | [M + K] <sup>+</sup>  | 188.0142 | 188.0143 | 0.60  |
| <i>monosodium glutamate</i> | [M + Na] <sup>+</sup> | 192.0242 | 192.0241 | -0.75 |
| <i>N-acetylaspartate</i>    | [M + H] <sup>+</sup>  | 176.0553 | 176.0552 | -0.53 |
|                             | [M + Na] <sup>+</sup> | 198.0373 | 198.0371 | -1.16 |
|                             | [M + K] <sup>+</sup>  | 214.0112 | 214.0111 | -0.36 |
| <i>Neurine +</i>            | [M] <sup>+</sup>      | 86.0964  | 86.0965  | 1.39  |
| <i>Nicotinamide</i>         | [M + H] <sup>+</sup>  | 123.0553 | 123.0554 | 0.42  |
|                             | [M + Na] <sup>+</sup> | 145.0373 | 145.0372 | -0.37 |
|                             | [M + K] <sup>+</sup>  | 161.0113 | 161.0111 | -1.33 |
| <i>Oxoproline</i>           | [M + H] <sup>+</sup>  | 130.0499 | 130.0499 | -0.26 |
|                             | [M + Na] <sup>+</sup> | 152.0318 | 152.0318 | -0.05 |
|                             | [M + K] <sup>+</sup>  | 168.0058 | 168.0057 | -0.83 |
| <i>Pantothenic acid</i>     | [M + K] <sup>+</sup>  | 258.0740 | 258.0741 | 0.49  |
| <i>PC 32:0</i>              | [M + H] <sup>+</sup>  | 734.5694 | 734.5692 | -0.25 |
|                             | [M + Na] <sup>+</sup> | 756.5514 | 756.5509 | -0.62 |
|                             | [M + K] <sup>+</sup>  | 772.5253 | 772.5245 | -0.99 |
| <i>PC 32:1</i>              | [M + H] <sup>+</sup>  | 732.5538 | 732.5542 | 0.54  |
|                             | [M + Na] <sup>+</sup> | 754.5357 | 754.5358 | 0.17  |
|                             | [M + K] <sup>+</sup>  | 770.5097 | 770.5096 | -0.07 |
| <i>PC 34:0</i>              | [M + H] <sup>+</sup>  | 762.6007 | 762.5992 | -1.91 |
|                             | [M + Na] <sup>+</sup> | 784.5827 | 784.5794 | -4.21 |
|                             | [M + K] <sup>+</sup>  | 800.5566 | 800.5546 | -2.47 |
| <i>PC 34:1</i>              | [M + H] <sup>+</sup>  | 760.5851 | 760.5847 | -0.50 |

|                         |                       |          |          |       |
|-------------------------|-----------------------|----------|----------|-------|
|                         | [M + Na] <sup>+</sup> | 782.5670 | 782.5668 | -0.25 |
|                         | [M + K] <sup>+</sup>  | 798.5410 | 798.5404 | -0.78 |
| <i>PC O-34:1</i>        | [M + H] <sup>+</sup>  | 746.6058 | 746.6047 | -1.42 |
|                         | [M + Na] <sup>+</sup> | 768.5878 | 768.5873 | -0.60 |
|                         | [M + K] <sup>+</sup>  | 784.5617 | 784.5613 | -0.46 |
| <i>PC 34:2</i>          | [M + H] <sup>+</sup>  | 758.5694 | 758.5703 | 1.16  |
|                         | [M + Na] <sup>+</sup> | 780.5514 | 780.5513 | -0.09 |
|                         | [M + K] <sup>+</sup>  | 796.5253 | 796.5253 | -0.04 |
| <i>PC 36:1</i>          | [M + H] <sup>+</sup>  | 788.6164 | 788.6158 | -0.74 |
|                         | [M + Na] <sup>+</sup> | 810.5983 | 810.5985 | 0.22  |
|                         | [M + K] <sup>+</sup>  | 826.5723 | 826.5720 | -0.36 |
| <i>PC 36:2</i>          | [M + H] <sup>+</sup>  | 786.6007 | 786.6012 | 0.63  |
|                         | [M + Na] <sup>+</sup> | 808.5827 | 808.5828 | 0.08  |
|                         | [M + K] <sup>+</sup>  | 824.5566 | 824.5569 | 0.35  |
| <i>PC 36:3</i>          | [M + Na] <sup>+</sup> | 806.5670 | 806.5687 | 2.14  |
| <i>PC 36:4</i>          | [M + Na] <sup>+</sup> | 804.5514 | 804.5508 | -0.81 |
|                         | [M + K] <sup>+</sup>  | 820.5253 | 820.5255 | 0.18  |
| <i>PC 38:3</i>          | [M + Na] <sup>+</sup> | 834.5983 | 834.6011 | 3.40  |
| <i>PC 38:4</i>          | [M + Na] <sup>+</sup> | 832.5827 | 832.5822 | -0.58 |
|                         | [M + K] <sup>+</sup>  | 848.5566 | 848.5566 | 0.05  |
| <i>PC 38:5</i>          | [M + Na] <sup>+</sup> | 830.5670 | 830.5667 | -0.42 |
|                         | [M + K] <sup>+</sup>  | 846.5410 | 846.5416 | 0.67  |
| <i>PC 38:6</i>          | [M + Na] <sup>+</sup> | 828.5514 | 828.5507 | -0.86 |
|                         | [M + K] <sup>+</sup>  | 844.5253 | 844.5251 | -0.18 |
| <i>PC 40:4</i>          | [M + K] <sup>+</sup>  | 876.5879 | 876.5873 | -0.64 |
| <i>PC 40:6</i>          | [M + Na] <sup>+</sup> | 856.5827 | 856.5820 | -0.85 |
|                         | [M + K] <sup>+</sup>  | 872.5566 | 872.5568 | 0.26  |
| <i>PC 40:7</i>          | [M + Na] <sup>+</sup> | 854.5670 | 854.5665 | -0.55 |
|                         | [M + K] <sup>+</sup>  | 870.5410 | 870.5405 | -0.61 |
| <i>PC 42:5</i>          | [M + H] <sup>+</sup>  | 864.6477 | 864.6514 | 4.24  |
| <i>PC O-36:7</i>        | [M + Na] <sup>+</sup> | 784.5257 | 784.5255 | -0.32 |
| <i>PC O-38:7</i>        | [M + Na] <sup>+</sup> | 812.5570 | 812.5569 | -0.14 |
| <i>PC O-40:10</i>       | [M + Na] <sup>+</sup> | 834.5413 | 834.5412 | -0.12 |
| <i>PC O-42:3</i>        | [M + K] <sup>+</sup>  | 892.6561 | 892.6576 | 1.67  |
| <i>PE 36:1</i>          | [M + Na] <sup>+</sup> | 768.5519 | 768.5524 | 0.69  |
| <i>PE 38:3</i>          | [M + Na] <sup>+</sup> | 792.5519 | 792.5535 | 1.98  |
| <i>PE 38:4</i>          | [M + Na] <sup>+</sup> | 790.5362 | 790.5351 | -1.40 |
|                         | [M + K] <sup>+</sup>  | 806.5102 | 806.5098 | -0.46 |
| <i>PE 38:6</i>          | [M + K] <sup>+</sup>  | 802.4789 | 802.4783 | -0.78 |
| <i>PE 40:6</i>          | [M + Na] <sup>+</sup> | 814.5362 | 814.5349 | -1.64 |
|                         | [M + K] <sup>+</sup>  | 830.5102 | 830.5098 | -0.45 |
| <i>PE O-34:2</i>        | [M + Na] <sup>+</sup> | 724.5257 | 724.5261 | 0.50  |
|                         | [M + K] <sup>+</sup>  | 740.4996 | 740.4995 | -0.12 |
| <i>PE O-36:2</i>        | [M + Na] <sup>+</sup> | 752.5570 | 752.5573 | 0.46  |
|                         | [M + K] <sup>+</sup>  | 768.5309 | 768.5305 | -0.54 |
| <i>PE O-36:3</i>        | [M + Na] <sup>+</sup> | 750.5413 | 750.5407 | -0.74 |
|                         | [M + K] <sup>+</sup>  | 766.5153 | 766.5150 | -0.45 |
| <i>PE O-36:4</i>        | [M + Na] <sup>+</sup> | 748.5257 | 748.5273 | 2.11  |
| <i>PE O-36:5</i>        | [M + K] <sup>+</sup>  | 762.4840 | 762.4835 | -0.63 |
| <i>PE O-38:4</i>        | [M + Na] <sup>+</sup> | 776.5570 | 776.5588 | 2.37  |
| <i>PE O-38:5</i>        | [M + K] <sup>+</sup>  | 790.5153 | 790.5147 | -0.75 |
| <i>PE O-38:6</i>        | [M + K] <sup>+</sup>  | 788.4996 | 788.4990 | -0.81 |
| <i>PE O-38:7</i>        | [M + K] <sup>+</sup>  | 786.4840 | 786.4837 | -0.38 |
| <i>PE O-40:5</i>        | [M + K] <sup>+</sup>  | 818.5466 | 818.5463 | -0.34 |
| <i>PE O-40:7</i>        | [M + K] <sup>+</sup>  | 814.5153 | 814.5147 | -0.73 |
| <i>PE O-40:8</i>        | [M + K] <sup>+</sup>  | 812.4996 | 812.4992 | -0.48 |
| <i>Phe</i>              | [M + H] <sup>+</sup>  | 166.0863 | 166.0862 | -0.76 |
|                         | [M + Na] <sup>+</sup> | 188.0683 | 188.0680 | -1.51 |
|                         | [M + K] <sup>+</sup>  | 204.0423 | 204.0423 | -0.24 |
| <i>Phosphocholine +</i> | [M] <sup>+</sup>      | 184.0733 | 184.0733 | -0.07 |
| <i>Pro</i>              | [M + H] <sup>+</sup>  | 116.0706 | 116.0708 | 1.34  |
|                         | [M + Na] <sup>+</sup> | 138.0526 | 138.0524 | -1.35 |
|                         | [M + K] <sup>+</sup>  | 154.0266 | 154.0266 | -0.12 |
| <i>Ribose</i>           | [M + Na] <sup>+</sup> | 173.0421 | 173.0419 | -0.83 |
| <i>Ser</i>              | [M + H] <sup>+</sup>  | 106.0499 | 106.0501 | 2.19  |

|                         |                       |          |          |       |
|-------------------------|-----------------------|----------|----------|-------|
|                         | [M + Na] <sup>+</sup> | 128.0319 | 128.0318 | -0.55 |
|                         | [M + K] <sup>+</sup>  | 144.0059 | 144.0059 | -0.07 |
| <i>SM 18:0</i>          | [M + H] <sup>+</sup>  | 731.6067 | 731.6054 | -1.72 |
|                         | [M + Na] <sup>+</sup> | 753.5887 | 753.5881 | -0.83 |
|                         | [M + K] <sup>+</sup>  | 769.5626 | 769.5605 | -2.75 |
| <i>Sodium Phosphate</i> | [M + Na] <sup>+</sup> | 142.9482 | 142.9481 | -0.75 |
| <i>Sorbitol</i>         | [M + Na] <sup>+</sup> | 205.0683 | 205.0683 | 0.22  |
| <i>Succinate</i>        | [M + Na] <sup>+</sup> | 141.0159 | 141.0156 | -1.90 |
|                         | [M + K] <sup>+</sup>  | 156.9899 | 156.9898 | -0.40 |
| <i>Taurine</i>          | [M + H] <sup>+</sup>  | 126.0219 | 126.0221 | 1.55  |
|                         | [M + Na] <sup>+</sup> | 148.0039 | 148.0039 | -0.11 |
|                         | [M + K] <sup>+</sup>  | 163.9779 | 163.9778 | -0.43 |
| <i>Thr</i>              | [M + H] <sup>+</sup>  | 120.0655 | 120.0656 | 1.07  |
|                         | [M + Na] <sup>+</sup> | 142.0475 | 142.0475 | 0.22  |
|                         | [M + K] <sup>+</sup>  | 158.0215 | 158.0215 | -0.10 |
| <i>Trp</i>              | [M + H] <sup>+</sup>  | 205.0972 | 205.0971 | -0.57 |
| <i>Tyr</i>              | [M + H] <sup>+</sup>  | 182.0812 | 182.0810 | -0.88 |
|                         | [M + Na] <sup>+</sup> | 204.0632 | 204.0631 | -0.59 |
|                         | [M + K] <sup>+</sup>  | 220.0371 | 220.0373 | 0.87  |
| <i>Urea</i>             | [M + Na] <sup>+</sup> | 83.0216  | 83.0216  | 0.54  |
|                         | [M + K] <sup>+</sup>  | 98.9955  | 98.9958  | 2.80  |
| <i>Val</i>              | [M + H] <sup>+</sup>  | 118.0863 | 118.0864 | 0.71  |
|                         | [M + Na] <sup>+</sup> | 140.0683 | 140.0680 | -1.97 |
|                         | [M + K] <sup>+</sup>  | 156.0423 | 156.0421 | -1.48 |
| <i>Xanthine</i>         | [M + Na] <sup>+</sup> | 175.0226 | 175.0226 | -0.01 |
|                         | [M + K] <sup>+</sup>  | 190.9966 | 190.9965 | -0.73 |



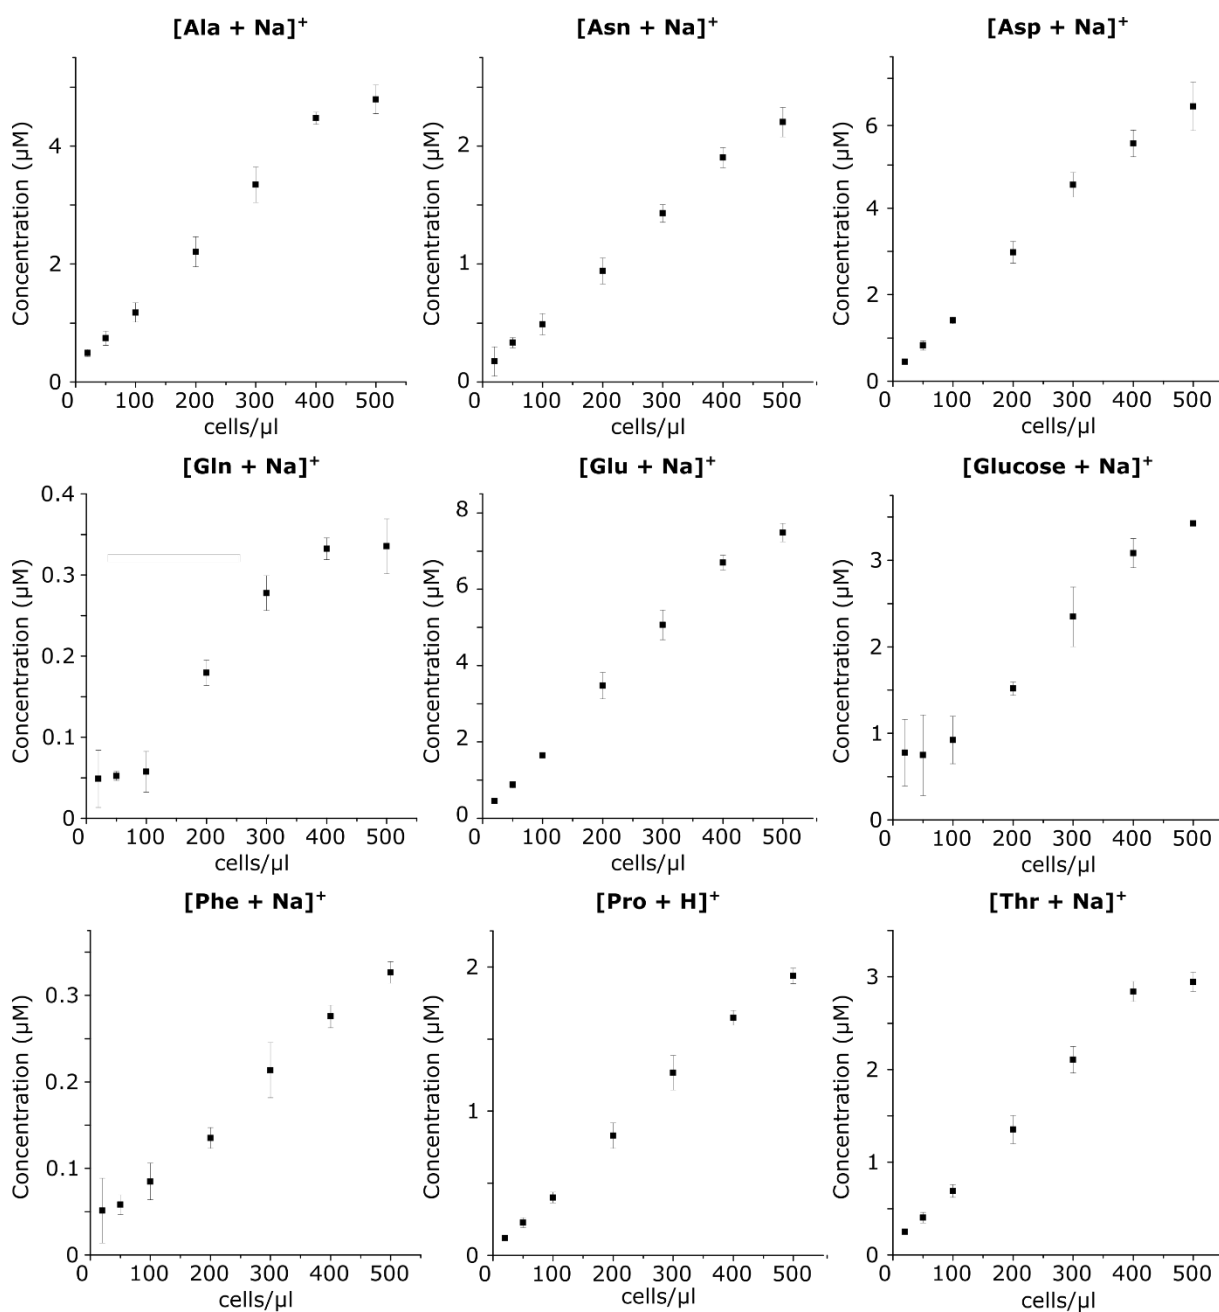

**Figure S6.** Individual plots of concentrations of endogenous small metabolites in 5  $\mu\text{l}$  samples with cell densities ranging from 20 to 500  $\text{cells}/\mu\text{l}$ . These compounds were quantified using the respective isotopically labelled internal standard.

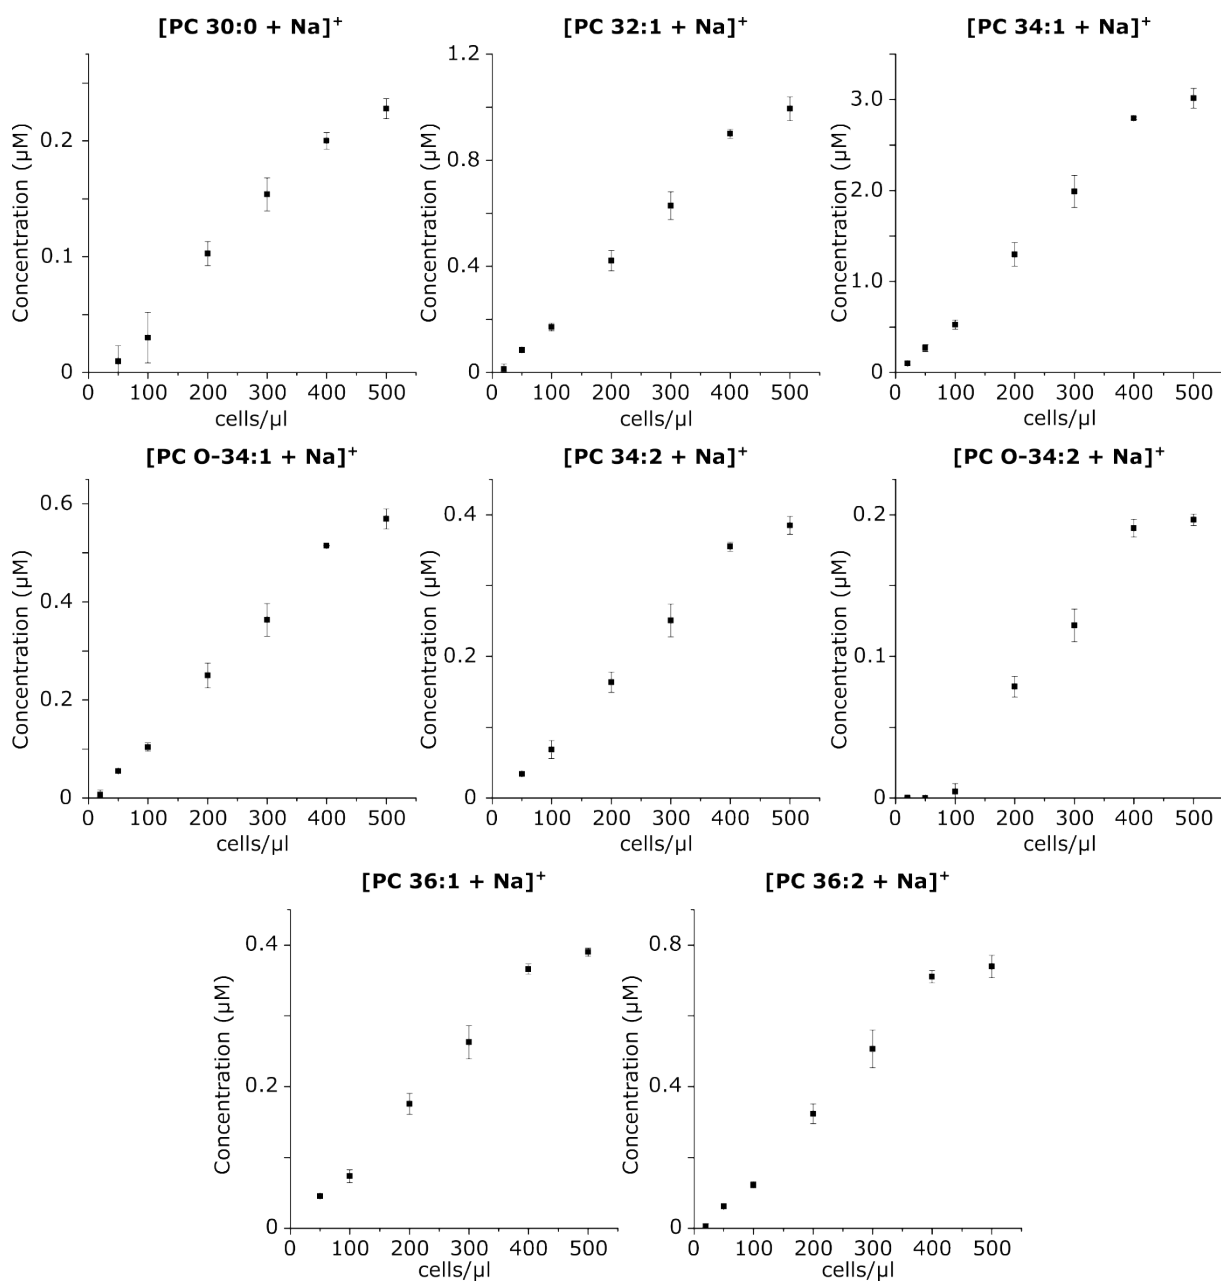

**Figure S7.** Individual plots of concentrations of endogenous lipids in 5 μl samples with cell densities ranging from 20 to 500 cells/μl. These compounds were quantified using the internal standard LPC 19:0.

**Table S10.** Significant features for non-target analysis present in the volcano plot of Figure 5. This data is the normalized with global median of the intensities of 191 putatively identified features.

|                                                    | Fold change | log <sub>2</sub> (FC) | P-value  |
|----------------------------------------------------|-------------|-----------------------|----------|
| [Sodium phosphate + H] <sup>+</sup>                | 0.37        | -1.43                 | 1.34E-16 |
| [Sorbitol + Na] <sup>+</sup>                       | 13.9        | 3.79                  | 1.49E-13 |
| [Sodium Phosphate + Na] <sup>+</sup>               | 0.33        | -1.59                 | 5.95E-12 |
| [Citrate + H] <sup>+</sup>                         | 0.78        | -0.36                 | 1.10E-07 |
| [Asp + Na] <sup>+</sup>                            | 0.41        | -1.30                 | 1.65E-07 |
| [Pro + Na] <sup>+</sup>                            | 1.40        | 0.49                  | 3.13E-07 |
| [Uracil + Na] <sup>+</sup>                         | 0.76        | -0.39                 | 2.11E-06 |
| [Glucose + K] <sup>+</sup>                         | 7.16        | 2.84                  | 3.17E-06 |
| [Glucose + Na] <sup>+</sup>                        | 7.51        | 2.91                  | 6.94E-06 |
| [Hydroxyproline + Na] <sup>+</sup>                 | 0.81        | -0.30                 | 2.50E-05 |
| [Choline] <sup>+</sup>                             | 1.26        | 0.34                  | 3.01E-05 |
| [C3 carnitine + H] <sup>+</sup>                    | 0.70        | -0.52                 | 3.50E-05 |
| [acetylcarnitine + H] <sup>+</sup>                 | 1.40        | 0.48                  | 7.30E-05 |
| [Glycerolphosphorylethanolamine + Na] <sup>+</sup> | 0.84        | -0.25                 | 7.94E-05 |
| [Gluconate + K] <sup>+</sup>                       | 0.79        | -0.34                 | 1.80E-04 |
| [PE 38:5 + K] <sup>+</sup>                         | 0.49        | -1.04                 | 1.95E-04 |
| [Gly + Na] <sup>+</sup>                            | 0.78        | -0.37                 | 4.79E-04 |
| [Asn + Na] <sup>+</sup>                            | 0.75        | -0.42                 | 4.95E-04 |
| [GABA + H] <sup>+</sup>                            | 0.79        | -0.34                 | 6.89E-04 |
| [Val + Na] <sup>+</sup>                            | 0.92        | -0.13                 | 0.001    |
| [Taurine + Na] <sup>+</sup>                        | 0.84        | -0.26                 | 0.002    |
| [Inosine + Na] <sup>+</sup>                        | 174.3       | 7.45                  | 0.003    |
| [PC e36:7 + K] <sup>+</sup>                        | 0.83        | -0.27                 | 0.004    |
| [FA 10:0 + Na] <sup>+</sup>                        | 0.82        | -0.29                 | 0.005    |
| [Dimethylaniline H] <sup>+</sup>                   | 0.81        | -0.31                 | 0.005    |
| [FA 12:0 + Na] <sup>+</sup>                        | 0.79        | -0.34                 | 0.006    |
| [Ala + Na] <sup>+</sup>                            | 1.10        | 0.14                  | 0.006    |
| [Val + H] <sup>+</sup>                             | 0.85        | -0.23                 | 0.007    |
| [Nonanoate + Na] <sup>+</sup>                      | 0.82        | -0.28                 | 0.008    |
| [Adipic acid + Na] <sup>+</sup>                    | 0.84        | -0.25                 | 0.008    |
| [FA 18:1 + Na] <sup>+</sup>                        | 1.29        | 0.36                  | 0.008    |
| [Octanoate + Na] <sup>+</sup>                      | 0.82        | -0.29                 | 0.009    |
| [GABA + Na] <sup>+</sup>                           | 0.87        | -0.20                 | 0.013    |
| [Arabitol + Na] <sup>+</sup>                       | 3.22        | 1.69                  | 0.017    |
| [Asp + H] <sup>+</sup>                             | 0.01        | -7.02                 | 0.019    |
| [Glycerol K] <sup>+</sup>                          | 0.72        | -0.47                 | 0.020    |
| [Gly + K] <sup>+</sup>                             | 0.30        | -1.73                 | 0.021    |
| [Succinate + Na] <sup>+</sup>                      | 0.82        | -0.28                 | 0.022    |
| [FA 16:0 + Na] <sup>+</sup>                        | 0.87        | -0.20                 | 0.023    |
| [Thr + Na] <sup>+</sup>                            | 0.59        | -0.77                 | 0.023    |
| [Lactate + Na] <sup>+</sup>                        | 0.76        | -0.40                 | 0.024    |
| [Caproic acid + Na] <sup>+</sup>                   | 0.84        | -0.26                 | 0.025    |
| [Taurine + H] <sup>+</sup>                         | 0.02        | -6.09                 | 0.025    |
| [Creatine + H] <sup>+</sup>                        | 0.91        | -0.13                 | 0.026    |
| [Glycerol + Na] <sup>+</sup>                       | 0.85        | -0.24                 | 0.027    |
| [Creatinine + Na] <sup>+</sup>                     | 0.95        | -0.07                 | 0.028    |
| [Ser + Na] <sup>+</sup>                            | 0.87        | -0.20                 | 0.029    |
| [PC 28:0 + Na] <sup>+</sup>                        | 4.07        | 2.02                  | 0.032    |
| [PC 32:0 + Na] <sup>+</sup>                        | 1.71        | 0.77                  | 0.034    |
| [Taurine + K] <sup>+</sup>                         | 0.74        | -0.43                 | 0.035    |
| [Putrescine + H] <sup>+</sup>                      | 0.80        | -0.32                 | 0.038    |
| [FA 12:0 + K] <sup>+</sup>                         | 0.85        | -0.23                 | 0.039    |
| [Lactate + K] <sup>+</sup>                         | 0.66        | -0.59                 | 0.039    |
| [Urea + K] <sup>+</sup>                            | 0.31        | -1.67                 | 0.042    |
| [Cer d42:2 + K] <sup>+</sup>                       | 0.46        | -1.13                 | 0.046    |
| [Glu + H] <sup>+</sup>                             | 0.84        | -0.25                 | 0.046    |

**Table S11.** Top pathways identified with MetaboAnalyst Network tool considering significant features from non-targeted analysis.

| Pathway                                     | Hits | P-value  |
|---------------------------------------------|------|----------|
| Alanine, aspartate and glutamate metabolism | 7    | 2.06E-06 |
| Glycine, serine and threonine metabolism    | 6    | 4.93E-05 |
| Arginine and proline metabolism             | 6    | 1.71E-04 |
| Glyoxylate and dicarboxylate metabolism     | 5    | 6.61E-04 |
| Fatty acid biosynthesis                     | 3    | 0.001    |
| Arginine biosynthesis                       | 3    | 0.004    |
| Butanoate metabolism                        | 3    | 0.005    |
| Citrate cycle (TCA cycle)                   | 3    | 0.006    |
| Pantothenate and CoA biosynthesis           | 3    | 0.007    |
| Glutathione metabolism                      | 3    | 0.010    |
| Valine, leucine and isoleucine biosynthesis | 2    | 0.015    |
| Glycerophospholipid metabolism              | 2    | 0.038    |

**A) Non-targeted data analysis**

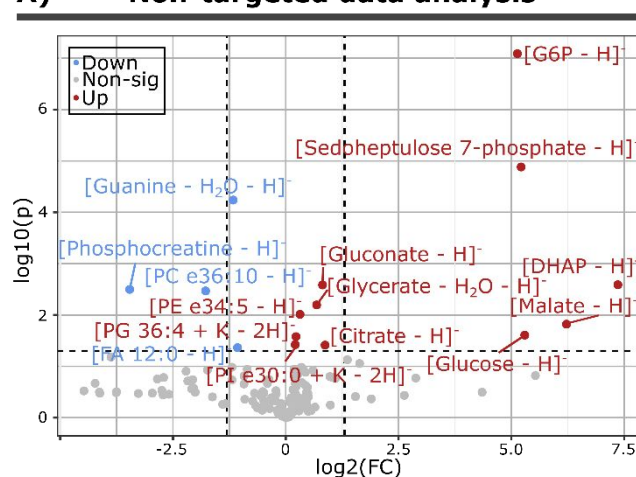

**B) Global Network**

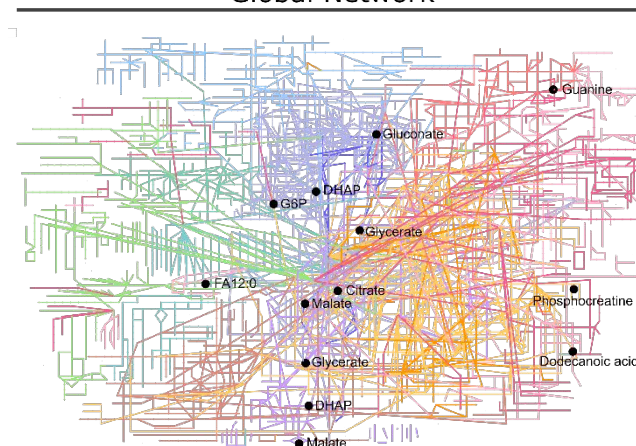

**Figure S8.** Non-targeted metabolite profiling of INS-1 cells exposed to either low (1 mM) or high (20 mM) glucose of data collected in negative mode. A) Non-targeted data analysis: Volcano plot originated from the global median normalization of a total of 176 features putatively assigned. A total of 15 metabolites were considered significant ( $p < 0.05$ ) according to Student's t-test analysis and fold change higher than 1.04. Red and blue correspond to up and down regulated features, respectively, and in grey are the non-significant features. B) Network: The global metabolomic network highlighting in black dots some of the significantly altered metabolites.

**Table S12.** Significant features for non-target analysis of data collected in negative mode present in the volcano plot of Figure S8. This data is the normalized with global median of the intensities of 176 putatively identified features.

|                                              | Fold change | log <sub>2</sub> (FC) | P-value  |
|----------------------------------------------|-------------|-----------------------|----------|
| [G6P - H] <sup>-</sup>                       | 35.10       | 5.133                 | 8.19E-08 |
| [Sedoheptulose 7-phosphate - H] <sup>-</sup> | 37.17       | 5.216                 | 1.31E-05 |
| [Guanine                                     | 0.446       | -1.166                | 5.75E-05 |
| [DHAP - H] <sup>-</sup>                      | 163.6       | 7.354                 | 0.003    |
| [Gluconate - H] <sup>-</sup>                 | 1.759       | 0.814                 | 0.003    |
| [Phosphocreatine - H] <sup>-</sup>           | 0.091       | -3.459                | 0.003    |
| [PC e36:11 - H] <sup>-</sup>                 | 0.292       | -1.778                | 0.003    |
| [Glycerate                                   | 1.608       | 0.685                 | 0.006    |
| [PE e34:6 - H] <sup>-</sup>                  | 1.245       | 0.316                 | 0.010    |
| [Malate - H] <sup>-</sup>                    | 74.72       | 6.223                 | 0.015    |
| [Glucose - H] <sup>-</sup>                   | 39.28       | 5.296                 | 0.025    |
| [PG a 36:4 - H] <sup>-</sup>                 | 1.170       | 0.226                 | 0.027    |
| [PI e 30:0 - H] <sup>-</sup>                 | 1.155       | 0.208                 | 0.038    |
| [Citrate - H] <sup>-</sup>                   | 1.828       | 0.870                 | 0.039    |
| [FA 12:0 - H] <sup>-</sup>                   | 0.476       | -1.070                | 0.043    |

**Table S13.** Top pathways identified with MetaboAnalyst Network tool considering significant features from non-targeted analysis of data collected in negative mode.

| <i>Pathway</i>                                         | <b>Hits</b> | <b>P-value</b> |
|--------------------------------------------------------|-------------|----------------|
| <i>Glycerolipid metabolism</i>                         | 2           | 8.54E-04       |
| <i>Glyoxylate and dicarboxylate metabolism</i>         | 3           | 8.99E-04       |
| <i>Citrate cycle (TCA cycle)</i>                       | 2           | 0.005          |
| <i>Inositol phosphate metabolism</i>                   | 2           | 0.008          |
| <i>Pentose phosphate pathway</i>                       | 2           | 0.009          |
| <i>Neomycin, kanamycin and gentamicin biosynthesis</i> | 1           | 0.014          |
| <i>Fatty acid biosynthesis</i>                         | 1           | 0.066          |
| <i>Starch and sucrose metabolism</i>                   | 1           | 0.086          |
| <i>Glycerophospholipid metabolism</i>                  | 1           | 0.086          |
| <i>Pyruvate metabolism</i>                             | 1           | 0.123          |
| <i>Fructose and mannose metabolism</i>                 | 1           | 0.129          |
| <i>Alanine, aspartate and glutamate metabolism</i>     | 1           | 0.176          |
| <i>Glycine, serine and threonine metabolism</i>        | 1           | 0.188          |
| <i>Arginine and proline metabolism</i>                 | 1           | 0.227          |
| <i>Purine metabolism</i>                               | 1           | 0.366          |
